# Supplementary material
Source: PubMed Central journal article supplement (PMC9189931)

---

**Supplementary information**

---

**A chemical probe targeting the PWWP domain alters NSD2 nucleolar localization**

---

In the format provided by the authors and unedited

## **Supplementary Information**

A chemical probe targeting the PWWP domain alters NSD2 nucleolar localization

David Dilworth<sup>1,\*,</sup>, Ronan P. Hanley<sup>2,\*</sup>, Renato Ferreira de Freitas<sup>1,\*,</sup>, Abdellah Allali-Hassani<sup>1,\*,</sup>, Mengqi Zhou<sup>1,\*,</sup>, Naimee Mehta<sup>2,||</sup>, Matthew R. Marunde<sup>3</sup>, Suzanne Ackloo<sup>1</sup>, Raquel Arminda Carvalho Machado<sup>1</sup>, Aliakbar Khalili Yazdi<sup>1</sup>, Dominic D. G. Owens<sup>1</sup>, Victoria Vu<sup>1</sup>, David Y. Nie<sup>1,8</sup>, Mona Alqazzaz<sup>1</sup>, Edyta Marcon<sup>4</sup>, Fengling Li<sup>1</sup>, Irene Chau<sup>1</sup>, Albina Bolotokova<sup>1</sup>, Su Qin<sup>%,1</sup>, Ming Lei<sup>1,5</sup>, Yanli Liu<sup>||</sup>, Magdalena M. Szewczyk<sup>1</sup>, Aiping Dong<sup>1</sup>, Sina Kazemzadeh<sup>2</sup>, Tigran Abramyan<sup>2</sup>, Irina K. Popova<sup>3</sup>, Nathan W. Hall<sup>3</sup>, Matthew J. Meiners<sup>3</sup>, Marcus A. Cheek<sup>3</sup>, Elisa Gibson<sup>1</sup>, Dmitri Kireev<sup>2</sup>, Jack F. Greenblatt<sup>4</sup>, Michael-C. Keogh<sup>3</sup>, Jinrong Min<sup>1,5</sup>, Peter J. Brown<sup>1</sup>, Masoud Vedadi<sup>1,6</sup>, Cheryl H. Arrowsmith<sup>1,7</sup>, Dalia Barsyte-Lovejoy<sup>1,6,\*</sup>, Lindsey I. James<sup>2,\*</sup>, Matthieu Schapira<sup>1,6,\*</sup>

Notable compounds in this study are UNC6934 (1), MR837 (2), MRT866 (3), UNC7145 (4), UNC7096 (5).

### **Contents**

**Supplementary Table 1.** Crystallographic data and refinement statistics

**Supplementary Table 2.** GPCR Selectivity Data

**Supplementary Table 3.** Primer Sequences for pre-rRNA Expression Analysis

**Supplementary Table 4.** Primer Sequences for ChIP & Gene Expression Analysis

**Supplementary Note--**Synthetic Procedures

**Supplementary Note--**Spectra and QC Data

**Supplementary Table 1.** Crystallographic data and refinement statistics

|                                                         | NSD2-PWWP1+MRT866     | NSD2-PWWP1+UNC6934    |
|---------------------------------------------------------|-----------------------|-----------------------|
| <b>PDB Code</b>                                         | 7MDN                  | 6XCG                  |
| <b>Data collection</b>                                  |                       |                       |
| Space group                                             | P1                    | P1                    |
| Cell dimensions                                         |                       |                       |
| <i>a</i> , <i>b</i> , <i>c</i> (Å)                      | 68.3, 69.1, 80.2      | 49.6, 50.0, 51.2      |
| $\alpha$ , $\beta$ , $\gamma$ (°)                       | 75.5, 79.4, 60.5      | 91.4, 91.9, 118.3     |
| Resolution (Å) (highest resolution shell)               | 48.81-2.42(2.51-2.42) | 50.00-1.64(1.67-1.64) |
| Unique reflections                                      | 42507                 | 49043                 |
| <i>R</i> <sub>merge</sub>                               | 5.4(60.2)             | 5.3(43.6)             |
| <i>I</i> / $\sigma$ <i>I</i>                            | 8.9(1.5)              | 37.9(1.9)             |
| Completeness(%)                                         | 90.4(91.9)            | 92.7(86.5)            |
| Redundancy                                              | 2.1(2.1)              | 5.0(2.6)              |
| CC(1/2)                                                 | 0.998(0.701)          | 0.958(0.763)          |
| <b>Refinement</b>                                       |                       |                       |
| Resolution (Å)                                          | 43.42-2.42            | 25.56-1.64            |
| No. reflections (test set)                              | 42500(2098)           | 47761(1168)           |
| <i>R</i> <sub>work</sub> / <i>R</i> <sub>free</sub> (%) | 21.8/25.1             | 17.8/22.2             |
| No. atoms                                               |                       |                       |
| Protein                                                 | 7473                  | 3180                  |
| Compound                                                | 184                   | 99                    |
| Water                                                   | 14                    | 608                   |
| B-factors (Å <sup>2</sup> )                             |                       |                       |
| Protein                                                 | 66.1                  | 22.5                  |
| Compound                                                | 55.9                  | 24.8                  |
| Water                                                   | 41.7                  | 31.1                  |
| RMSD                                                    |                       |                       |
| Bond lengths (Å)                                        | 0.01                  | 0.011                 |
| Bond angles (°)                                         | 1.06                  | 1.434                 |
| Ramachandran plot % residues                            |                       |                       |
| Favored                                                 | 99.2                  | 99.5                  |
| Additional allowed                                      | 0.8                   | 0.5                   |
| Generously allowed                                      | 0                     | 0.0                   |
| Disallowed                                              | 0                     | 0.0                   |

**Supplementary Table 2. GPCR Selectivity Data**

| Compound       | Receptor           | Inhibition<br>1 | Inhibition<br>2 | Inhibition<br>3 | Inhibition<br>4 | Mean<br>% | Ki (nM) |
|----------------|--------------------|-----------------|-----------------|-----------------|-----------------|-----------|---------|
| <b>UNC6934</b> | 5-HT1A             | 23.89           | 1.72            | -0.07           | 27.68           | 13.31     |         |
| <b>UNC6934</b> | 5-HT1B             | 10.33           | -2.42           | -0.58           | -3.75           | 0.9       |         |
| <b>UNC6934</b> | 5-HT1D             | 6.2             | 15.98           | 10.6            | 12.16           | 11.24     |         |
| <b>UNC6934</b> | 5-HT1E             | 2.09            | 9.97            | -3.74           | -11.49          | -0.79     |         |
| <b>UNC6934</b> | 5-HT2A             | 11.6            | 22.44           | 13.9            | 42.9            | 22.71     |         |
| <b>UNC6934</b> | 5-HT2B             | 1.7             | 4.62            | 4.48            | 12.52           | 5.83      |         |
| <b>UNC6934</b> | 5-HT2C             | 19.25           | 27.09           | 20.15           | 25.53           | 23.01     |         |
| <b>UNC6934</b> | 5-HT3              | 8.3             | -48.2           | -23.33          | 1.49            | -15.44    |         |
| <b>UNC6934</b> | 5-HT5A             | 12.19           | 1.38            | 9.11            | 12.97           | 8.91      |         |
| <b>UNC6934</b> | 5-HT6              | 8.82            | 15.47           | -1.64           | -15.59          | 1.77      |         |
| <b>UNC6934</b> | 5-HT7A             | -9.65           | -16.68          | 1.5             | -2.27           | -6.78     |         |
| <b>UNC6934</b> | Alpha1A            | 20.43           | 18.61           | -3.86           | 19.06           | 13.56     |         |
| <b>UNC6934</b> | Alpha1B            | 40.57           | 24.76           | 24.89           | 22.77           | 28.25     |         |
| <b>UNC6934</b> | Alpha1D            | 4.23            | 13.02           | 3.05            | 57.98           | 19.57     |         |
| <b>UNC6934</b> | Alpha2A            | 4.73            | -24.1           | -17.27          | 18.38           | -4.57     |         |
| <b>UNC6934</b> | Alpha2B            | 9.74            | 2.91            | 11.02           | 29.31           | 13.25     |         |
| <b>UNC6934</b> | Alpha2C            | 19.32           | 4.02            | 4.71            | 30.21           | 14.57     |         |
| <b>UNC6934</b> | Beta1              | -3.98           | -3.07           | -7.91           | -20.94          | -8.98     |         |
| <b>UNC6934</b> | Beta2              | 13.97           | -5.56           | 82.85           | 6.37            | 24.41     |         |
| <b>UNC6934</b> | Beta3              | 30.07           | 24.21           | -15.58          | -2.12           | 9.15      |         |
| <b>UNC6934</b> | BZP Rat Brain Site | -4.03           | -3.8            | -17.77          | -12.59          | -9.55     |         |
| <b>UNC6934</b> | D1                 | 6.69            | 3.77            | -2.6            | 5.23            | 3.27      |         |
| <b>UNC6934</b> | D2                 | -4.48           | -4.31           | -10.72          | -6.91           | -6.61     |         |
| <b>UNC6934</b> | D3                 | 11.52           | 11.17           | 20              | 23.53           | 16.56     |         |
| <b>UNC6934</b> | D4                 | -40.11          | 22.04           | -4.7            | 10.84           | -2.98     |         |
| <b>UNC6934</b> | D5                 | 1.99            | -18.91          | -17.91          | -11.61          | -11.61    |         |
| <b>UNC6934</b> | DAT                | 58.31           | 37.73           | 29.93           | 50.18           | 44.04     |         |
| <b>UNC6934</b> | DOR                | 10.82           | 10.22           | 15.29           | 33.28           | 17.4      |         |
| <b>UNC6934</b> | GABAA              | 11.16           | 15.2            | 4.38            | 12.26           | 10.75     |         |
| <b>UNC6934</b> | H1                 | 54.96           | 42.68           | 35.32           | 43.17           | 44.03     |         |
| <b>UNC6934</b> | H2                 | 35.37           | 22.4            | 31.25           | 0               | 22.26     |         |
| <b>UNC6934</b> | H3                 | -32.92          | -48.2           | -14.64          | -41.91          | -34.42    | >10,000 |
| <b>UNC6934</b> | H4                 | 5.69            | 0.91            | 2.24            | -1.73           | 1.78      |         |
| <b>UNC6934</b> | KOR                | -3.75           | -8.91           | 11.91           | 0.42            | -0.08     |         |
| <b>UNC6934</b> | M1                 | -10.22          | -17.92          | -17.51          | 9.88            | -8.94     |         |
| <b>UNC6934</b> | M2                 | 32.73           | -6.4            | -15.42          | 5.35            | 4.07      |         |
| <b>UNC6934</b> | M3                 | 23.96           | 6.74            | 13.69           | 22.3            | 16.67     |         |
| <b>UNC6934</b> | M4                 | -32.86          | -18.65          | -29.66          | -0.18           | -20.34    |         |
| <b>UNC6934</b> | M5                 | 15.73           | -3.16           | -25.62          | -7.44           | -5.12     |         |
| <b>UNC6934</b> | MOR                | 58.55           | 33.8            | 60.34           | 46.59           | 49.82     |         |
| <b>UNC6934</b> | NET                | -19.48          | -14.89          | -34.9           | -2.91           | -18.05    |         |

|                |                    |        |        |        |        |        |         |
|----------------|--------------------|--------|--------|--------|--------|--------|---------|
| <b>UNC6934</b> | PBR                | 50.16  | 55.79  | 119.56 | 133.39 | 89.73  | >10,000 |
| <b>UNC6934</b> | SERT               | 59.39  | 55.69  | 62.25  | 62.37  | 59.93  | 1394    |
| <b>UNC6934</b> | Sigma 1            | 12.15  | 30.62  | 23.33  | 40.83  | 26.73  |         |
| <b>UNC6934</b> | Sigma 2            | 10.74  | -11.26 | 12.66  | 2.51   | 3.66   |         |
| <b>UNC7145</b> | 5-HT1A             | 27.48  | -5.07  | 4.92   | 15.9   | 10.81  |         |
| <b>UNC7145</b> | 5-HT1B             | 12.5   | 10.83  | -6.83  | 1.67   | 4.54   |         |
| <b>UNC7145</b> | 5-HT1D             | 8.61   | 5.21   | 22.08  | 5.35   | 10.31  |         |
| <b>UNC7145</b> | 5-HT1E             | 4.76   | 31.55  | -6.03  | 1.84   | 8.03   |         |
| <b>UNC7145</b> | 5-HT2A             | 10.51  | -6.85  | 0.52   | -29.4  | -6.31  |         |
| <b>UNC7145</b> | 5-HT2B             | 5.79   | 8.13   | 3.45   | 6.23   | 5.9    |         |
| <b>UNC7145</b> | 5-HT2C             | 30.91  | 1.77   | 12.75  | 47.94  | 23.34  |         |
| <b>UNC7145</b> | 5-HT3              | -12.2  | -17.82 | -13.61 | 3.54   | -10.02 |         |
| <b>UNC7145</b> | 5-HT5A             | -4.54  | 17.86  | 0.61   | -0.42  | 3.38   |         |
| <b>UNC7145</b> | 5-HT6              | 6.67   | 29.26  | 8.16   | 31.25  | 18.84  |         |
| <b>UNC7145</b> | 5-HT7A             | -14.02 | 3.04   | -14.28 | -5.79  | -7.76  |         |
| <b>UNC7145</b> | Alpha1A            | 7.26   | 2.5    | -3.18  | -1.59  | 1.25   |         |
| <b>UNC7145</b> | Alpha1B            | 6.29   | 19.45  | 14.93  | 28.08  | 17.19  |         |
| <b>UNC7145</b> | Alpha1D            | 11.32  | 14.34  | 14.94  | 39.15  | 19.94  |         |
| <b>UNC7145</b> | Alpha2A            | -14.24 | -20.74 | -0.26  | 15.24  | -5     |         |
| <b>UNC7145</b> | Alpha2B            | 3.03   | -3.23  | 8.47   | 31.28  | 9.89   |         |
| <b>UNC7145</b> | Alpha2C            | 28.82  | 8.6    | -14.3  | 25.71  | 12.21  |         |
| <b>UNC7145</b> | Beta1              | 6.02   | 14.8   | -52.14 | -3.07  | -8.6   |         |
| <b>UNC7145</b> | Beta2              | 1.49   | 40.27  | 70.37  | 8.27   | 30.1   |         |
| <b>UNC7145</b> | Beta3              | 5.37   | -5.28  | 5.95   | 16.37  | 5.6    |         |
| <b>UNC7145</b> | BZP Rat Brain Site | 5.44   | -25.88 | -7.41  | -3.35  | -7.8   |         |
| <b>UNC7145</b> | D1                 | -2.7   | -1.76  | -6.35  | 0.22   | -2.65  |         |
| <b>UNC7145</b> | D2                 | -9.68  | -12.97 | -0.67  | -9.68  | -8.25  |         |
| <b>UNC7145</b> | D3                 | 27.42  | -50.29 | 36.25  | 34.83  | 12.05  |         |
| <b>UNC7145</b> | D4                 | 1.99   | 8.49   | -5.24  | 18.07  | 5.83   |         |
| <b>UNC7145</b> | D5                 | 14.26  | -9.29  | 3.65   | -12.6  | -1     |         |
| <b>UNC7145</b> | DAT                | 1.22   | -15.04 | 4.54   | 6.87   | -0.6   |         |
| <b>UNC7145</b> | DOR                | 19.03  | 14.81  | 54.54  | 42.46  | 32.71  |         |
| <b>UNC7145</b> | GABAA              | 3.46   | 10.06  | 13     | 10.8   | 9.33   |         |
| <b>UNC7145</b> | H1                 | 58.15  | 74.1   | 54.96  | 72.14  | 64.84  | >10,000 |
| <b>UNC7145</b> | H2                 | 15.1   | -3.62  | 2.94   | 5.85   | 5.07   |         |
| <b>UNC7145</b> | H3                 | -5.06  | -8.35  | -33.22 | 0      | -11.66 |         |
| <b>UNC7145</b> | H4                 | 8.13   | 1.73   | 9.35   | 4.88   | 6.02   |         |
| <b>UNC7145</b> | KOR                | -0.58  | -9.08  | 3.25   | -4.08  | -2.62  |         |
| <b>UNC7145</b> | M1                 | -10.22 | -9.47  | 7.29   | -8.25  | -5.16  |         |
| <b>UNC7145</b> | M2                 | 3.1    | -64.69 | -15.74 | 0.85   | -19.12 |         |
| <b>UNC7145</b> | M3                 | 1.01   | 4.19   | -4.98  | 9.48   | 2.43   |         |
| <b>UNC7145</b> | M4                 | 45.8   | 9.36   | -24.04 | -34.16 | -0.76  |         |
| <b>UNC7145</b> | M5                 | 56.73  | 14.3   | -2.81  | -13.5  | 13.68  |         |
| <b>UNC7145</b> | MOR                | 67.07  | 60.61  | 74.77  | 61.99  | 66.11  | 7950    |

|                |         |        |        |        |        |        |         |
|----------------|---------|--------|--------|--------|--------|--------|---------|
| <b>UNC7145</b> | NET     | -48.79 | 0      | -30.44 | 4.22   | -18.75 |         |
| <b>UNC7145</b> | PBR     | 67.57  | 91.65  | 117.51 | 134.92 | 102.91 | >10,000 |
| <b>UNC7145</b> | SERT    | 61.06  | 20.02  | 41.02  | 37.08  | 39.8   |         |
| <b>UNC7145</b> | Sigma 1 | 1.94   | -1.94  | 4.37   | 39.85  | 11.06  |         |
| <b>UNC7145</b> | Sigma 2 | 12.51  | -10.41 | -24.56 | 9.2    | -3.32  |         |

**Supplementary Table 3.** Primer Sequences for pre-rRNA Expression Analysis

| Target   | Forward                  | Reverse               | Reference |
|----------|--------------------------|-----------------------|-----------|
| B2M      | GAGTGCTGTCTCCATGTTTGATGT | AAGTTGCCAGCCCTCCTAGAG | 57        |
| pre-rRNA | GCCTTCTCTAGCGATCTGAGAG   | CCATAACGGAGGCAGAGACA  | 58        |

**Supplementary Table 4.** Primer Sequences for ChIP & Gene Expression Analysis

| Target   | Forward                 | Reverse                  | Application |
|----------|-------------------------|--------------------------|-------------|
| TBP      | GGGCATTATTTGTGCACTGAGA  | TAGCAGCACGGTATGAGCAACT   | qPCR        |
| BACE2    | ACCATCCCCAAAGGCTTCAATA  | GTCTCCAGAGA AACTTGATGGCT | qPCR        |
| CA2      | TCACTTTCACTGGGGTTCCTT   | CTGCACAGCTTTCCCAAATCC    | qPCR        |
| CDC42    | TGCAGTCACAGTTATGATTGGT  | GTGGATAACTCAGCGGTCGTAA   | qPCR        |
| c-MYC    | TTCTCTCCGTCTCGGATTCTC   | CCTGCCTCTTTTCCACAGAAAC   | qPCR        |
| TGFA     | CCCTGGCTGTCCTTATCATCAC  | GGCACCCTCACAGTGTTTTT     | qPCR        |
| DSG2     | AGGGAGAGGATCTGTCCAAGAA  | TGGCTCTGTAATCCCTTTTCCA   | qPCR        |
| ADAM9    | ACTAGAGAAAGAAGAGAAGCCCC | ATATGCTCTTTTCTTCAGCCT    | qPCR        |
| NEO1     | ATTATCAGTGTGTGGCCACTGT  | CCCAGCATAAACTGAGGAAGGT   | qPCR        |
| WASF3    | AAAGTCACCCAGCTGGATTCAA  | CTGGTCTTGGACTGTGGA AACTT | qPCR        |
| SERPINE2 | CTCGCCATGGTGATGAGATACG  | ACGATGGCCTTGTTGATCTTCT   | qPCR        |
| CDH2     | GGGTCATCCCTCCAATCAACTT  | ACCCGAGATGGGGTTGATAATG   | qPCR        |
| ITGB1    | TACTCAGATCCAACCACAGCAG  | AGGTCAATGGGATAGTCTTCAGC  | qPCR        |
| GPC1     | CTGCTCGTCTCTTTGTGCAG    | GAGCACAGTAGACCAGCTTCAT   | qPCR        |
| SNTB1    | AAGGAGCATAGTACAGGGTTGC  | CCTCCTGGTTTTTGTAGGTGC    | qPCR        |
| PFN2     | ACAATGGACATCCGACAAAGA   | GACACCTTCTTTCCCATGACT    | qPCR        |
| ID2      | ACACGGATATCAGCATCCTGTC  | CACACAGTGCTTTGCTGTCATT   | qPCR        |
| TWIST1   | GCCGGAGACCTAGATGTCATTG  | CGCCCTGTTTCTTTGAATTTGG   | qPCR        |
| ZYX      | CCTCCCAGCTTCACCTATGC    | ACCTCCTTCAGAGTCAGGGG     | qPCR        |
| CEACAM21 | GTGTGAGGTCTCCAACCCAG    | TTCGGAGGAGCAGGAAACAC     | qPCR        |
| RHOB     | CCGAGGTGAAGCACTTCTGT    | AGAGCACTCGAGGTAGTCGT     | qPCR        |
| CLDN3    | GGGACTTCTACAACCCCGTG    | TGGTGGCCGTGTA CTTCTTC    | qPCR        |
| HOXB9    | GTGTGAAGAACAAAGACAAGAG  | CAGAGAGGGAGAAGAGAGAA     | ChIP        |
| HOXC4/8  | CACCTCAGTCAATACCTCATATC | TCAGCGCTCATAAATGTCTC     | ChIP        |
| PLEKHA6  | CTGTGGGCATAAGGGTTAAA    | GAAGGGAGA AACTGCTCAATC   | ChIP        |

|           |                         |                         |      |
|-----------|-------------------------|-------------------------|------|
| ATF7      | CTGTCCTCTTGTCCCTTGTTT   | GACTTCGCAGATCAGTAAGAG   | ChIP |
| HMCN1     | CATGCCTGGAGAGATTCTATTT  | TCTCCGGTGTCTGCTTTA      | ChIP |
| SKAP1     | CACCTCAGTCAATACCTCATATC | TCAGCGCTCATAAATGTCTC    | ChIP |
| FOS       | CCTCACCCTTTCGGAGTC      | CCTCCTGCCAATGCTCT       | ChIP |
| BACE2     | CTAGCACATAACCGCTCCAA    | GATGGTGACGAGGTCTTCC     | ChIP |
| CA2       | AGCACTGGCATAAAGGACTTC   | CTTCAGGGAAGGGTCATACTTG  | ChIP |
| CDC42     | CCTCCAACCTGATGACCTATTC  | GGAAGTCAGCTAAGAACTAGGG  | ChIP |
| c-MYC     | GGTGCAGCCGATTTCTACT     | AGCAGCTCGAATTTCTTCCA    | ChIP |
| TGFA      | GTGATGGCCTGCTTCTTCT     | TGCCATTCTGGGTACGTTG     | ChIP |
| DSG2      | GTATCTCTGGAGCCTGCTTATC  | CTCTCTGTCCAAGGTAACACTG  | ChIP |
| ADAM9     | CTTCAACAGACCTCACATCTTTC | GGGCTTCTTCTTTCTCTAGTT   | ChIP |
| NEO1      | GGAGTTCAGGCTTCCATTCT    | GGGAGTCTGTAATCTTCTGGTG  | ChIP |
| WASF3     | GGGTCTTCTTTTCGTCCTC     | GTCGCTTCGAGCATCACT      | ChIP |
| SERPINE2  | CGAGAGACAGAGGATTGAAGTG  | CTTGGTGGAAGGAACCATGA    | ChIP |
| CDH2      | TTTCCTGGGTCTCTTTGTCTTG  | GGATGAAGATGGCATGGTGTAT  | ChIP |
| ITGB1     | GCTGTGGTTGGATCTGAGTAA   | CCCAGAGGCTCCAAAGATATAAA | ChIP |
| GPC1      | TGCCTGATGACTACCTGGA     | GCACAAAGGAGCGAGCA       | ChIP |
| SNTB1     | TCTCTGTGGAAGGAGAAGGA    | CGAGATTGGGTGGGAAACA     | ChIP |
| PDN2      | GCAGTCACCATCGACGTATAG   | CCGGGAAGGTTTCTTTACCA    | ChIP |
| GAS1      | GTCATCGTAGTCCTCATCGTAG  | GAGTCGGTCAAGGAGAACAT    | ChIP |
| ID2       | CGATGAGCCTGCTATAACAACAT | TCCATCTTGCTCACCTTCTTG   | ChIP |
| TWIST1    | AGCTTGCCATCTTGGAGTC     | AGCTGAGCAAGATTCAGACC    | ChIP |
| rDNA -1kb | CCGTGGGTTGTCTTCTGAC     | AAGCGAAACCGTGAGTCG      | ChIP |
| rDNA      |                         |                         |      |
| 5ETS      | CCTCCAGTGGTTGTGCGACTT   | GAACGACACACCACCGTTC     | ChIP |
| rDNA ITS1 | CCCGTGGTGTGAAACCTTC     | AAGAGGAGAGGGGGTTGC      | ChIP |
| rDNA IGS  | GTGTGCCTCCGTCTTCTCTC    | GTCAAGGGGCTATGCCATC     | ChIP |

---

## **Synthetic Procedures:**

### **General Chemistry Procedures**

Reactions were carried out using conventional glassware. All reagents and solvents were used as received unless otherwise stated. Reagents were of 95% purity or greater, and solvents were reagent grade unless otherwise stated. Any anhydrous solvents used were purchased as “anhydrous” grade and used without further drying. “Room” or ambient temperature varied between 20-25 °C. Analytical thin layer chromatography (TLC) was carried out using glass plates pre-coated with silica gel (Merck) impregnated with fluorescent indicator (254 nm). TLC plates were visualized by illumination with a 254 nm UV lamp. Analytical LCMS data for all compounds were acquired using an Agilent 1260 Infinity II system with the UV detector set to 254 nm. Samples were injected (<10 µL) onto an Agilent ZORBAX Eclipse Plus C18, 600 Bar, 4.6 x 50 mm, 1.8 µm column at 25 °C. Mobile phases A (H<sub>2</sub>O + 0.1% acetic acid), B (MeOH + 0.1% acetic acid), and C (99% MeCN + 1% H<sub>2</sub>O + 0.1% acetic acid) were used with a linear gradient from 10% to 100% B or C in 5 min, followed by a flush at 100% B or C for another 2 minutes with a flow rate of 1 mL/min. Mass spectra (MS) data were acquired in positive ion mode using an Agilent InfinityLab LC/MSD single quadrupole mass spectrometer with an electrospray ionization (ESI) source. Normal phase column chromatography was performed with a Teledyne Isco CombiFlash<sup>®</sup>R<sub>f</sub> 200 using RediSep<sup>®</sup>R<sub>f</sub> SILICA columns with the UV detector set to 254 nm and 280 nm. Reverse phase column chromatography was performed with a Teledyne Isco CombiFlash<sup>®</sup>R<sub>f</sub> 200 using C18 RediSep<sup>®</sup>R<sub>f</sub> Gold columns with the UV detector set to 220 nm and 254 nm. Analytical LCMS (at 254 nm) was used to establish the purity of targeted compounds. HRMS collected using an Agilent 6545 QTOF instrument. All compounds that were evaluated in biochemical and biophysical assays had >95% purity as determined by LCMS or NMR (spectra provided in Supplementary Note).

### **Nuclear Magnetic Resonance Spectroscopy (NMR)**

<sup>1</sup>H and <sup>13</sup>C NMR spectra were obtained on a Varian 400MR at 400 MHz and 101 MHz respectively. Chemical shifts are reported in ppm and coupling constants are reported in Hz with CDCl<sub>3</sub> referenced at 7.26 (<sup>1</sup>H) and 77.1 ppm (<sup>13</sup>C), DMSO-*d*<sub>6</sub> referenced at 2.50 (<sup>1</sup>H) and 39.5 ppm (<sup>13</sup>C), acetone-*d*<sub>6</sub> referenced at 2.05 (<sup>1</sup>H) and 29.8 ppm (<sup>13</sup>C), and MeOD-*d*<sub>4</sub> referenced at 3.31 (<sup>1</sup>H) and 49.0 ppm (<sup>13</sup>C). All compounds that were evaluated in biochemical and biophysical assays had >95% purity as determined by <sup>1</sup>H NMR or LCMS (spectra provided in Supplementary Note).

### **High-Resolution Mass Spectrometry**



Samples were prepared by dilution with 600  $\mu\text{L}$  of acetonitrile. Samples were further diluted using 100  $\mu\text{L}$  of the compound solution in 900  $\mu\text{L}$  of acetonitrile, regardless of the original dilution solvent. Samples were analyzed with a ThermoFisher Q Exactive HF-X (ThermoFisher, Bremen, Germany) mass spectrometer coupled with a Waters Acquity H-class liquid chromatograph system. Samples were introduced via a heated electrospray source (HESI) at a flow rate of 0.6 mL/min. Electrospray source conditions were set as: spray voltage 3.0 kV, sheath gas (nitrogen) 60 arb, auxiliary gas (nitrogen) 20 arb, sweep gas (nitrogen) 0 arb, nebulizer temperature 375  $^{\circ}\text{C}$ , capillary temperature 380  $^{\circ}\text{C}$ , RF funnel 45 V. The mass range was set to 150-2000  $m/z$ . All measurements were recorded at a resolution setting of 120,000.

Separations were conducted on a Waters Acquity UPLC BEH C18 column (2.1 x 50 mm, 1.7  $\mu\text{m}$  particle size). LC conditions were set at 95% water with 0.1% formic acid (A) ramped linearly over 5 mins to 100% acetonitrile with 0.1% formic acid (B) and held until 6 mins. At 7 mins the gradient was switched back to 95% A and allowed to re-equilibrate until 9 mins. The injection volume for all samples was 3  $\mu\text{L}$ . Xcalibur (ThermoFisher, Bremen, Germany) was used to analyze the data. Solutions were analyzed at 0.1 mg/mL or less based on responsiveness to the ESI mechanism. Molecular formula assignments were determined with Molecular Formula Calculator (v 1.2.3). All observed species were singly charged, as verified by unit  $m/z$  separation between mass spectral peaks corresponding to the  $^{12}\text{C}$  and  $^{13}\text{C}^{12}\text{C}_{c-1}$  isotope for each elemental composition.

#### Abbreviations used

|       |                                                                               |
|-------|-------------------------------------------------------------------------------|
| DCM   | Dichloromethane                                                               |
| DIPEA | <i>N,N</i> -Diisopropylethylamine                                             |
| DMAP  | 4-(Dimethylamino)pyridine                                                     |
| DMF   | <i>N,N</i> -Dimethylformamide                                                 |
| DMSO  | Dimethylsulfoxide                                                             |
| EDC   | <i>N</i> -(3-Dimethylaminopropyl)- <i>N'</i> -ethylcarbodiimide hydrochloride |
| HOAt  | 1-Hydroxy-7-azabenzotriazole                                                  |
| LCMS  | Liquid Chromatography-Mass Spectrometry                                       |
| NMR   | Nuclear Magnetic Resonance                                                    |

TCFH Chloro-*N,N,N',N'*-tetramethylformamidinium hexafluorophosphate

TFA 2,2,2-Trifluoroacetic acid

THF Tetrahydrofuran

### Synthetic Schemes

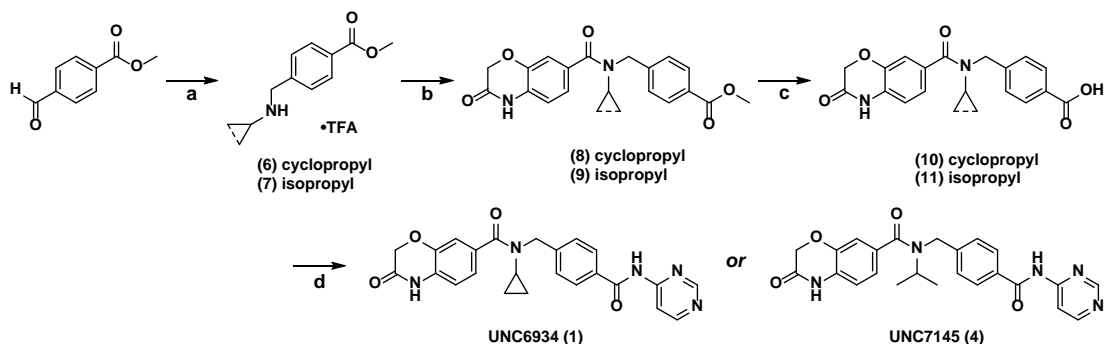

**Scheme 1: Synthesis of probe compounds.** Reagents and conditions: a) i. (cyclo/iso)propylamine, MeOH ii. NaBH<sub>4</sub>; b) 3-oxo-3,4-dihydro-2*H*-benzo[*b*][1,4]oxazine-7-carboxylic acid, EDC, HOAt, triethylamine, MeCN; c) LiOH•H<sub>2</sub>O; d) 4-aminopyrimidine, 1-methylimidazole, TCFH<sup>1</sup>.

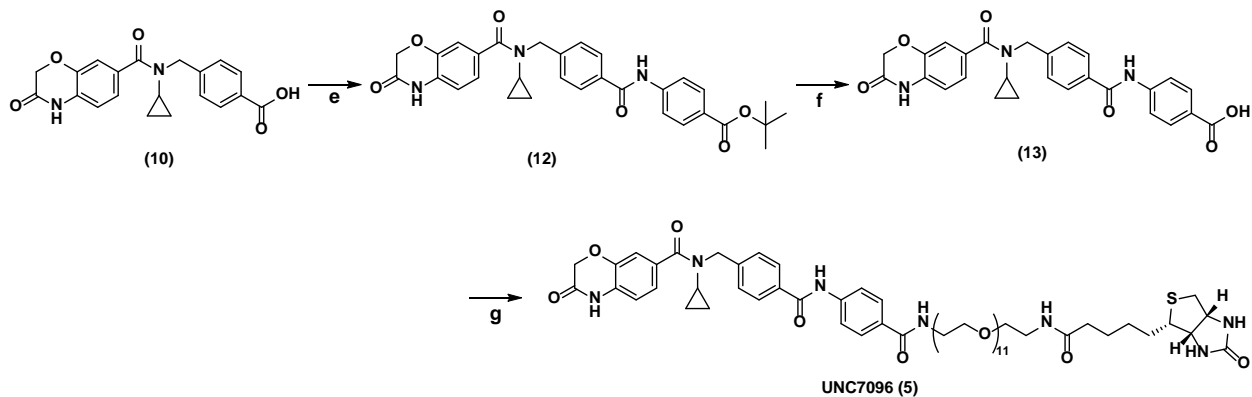

**Scheme 2: Synthesis of biotinylated tool compound UNC7096.** Reagents and conditions: e) *tert*-butyl 4-aminobenzoate, EDC, DMAP, DMF; f) TFA, DCM; g) Biotin-PEG11-amine, EDC, HOAt, DIPEA, DMF.

**methyl 4-((cyclopropylamino)methyl)benzoate trifluoroacetate salt (6)**

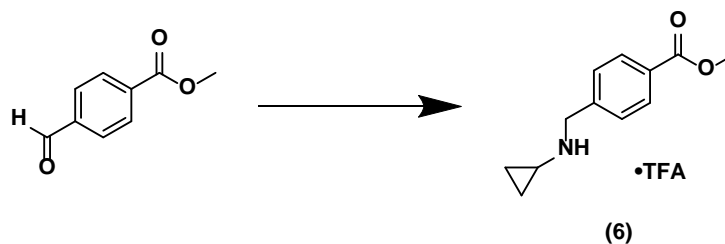

To a 50 mL flask equipped with a stir bar was added methyl 4-formylbenzoate (1.0 g, 1 Eq, 6.1 mmol) and methanol (10 mL), followed by cyclopropylamine (0.35 g, 0.43 mL, 1 Eq, 6.1 mmol). The flask was capped and stirred at room temperature overnight. The next day, the flask was cooled in an ice water bath and sodium borohydride (0.46 g, 2 Eq, 12 mmol) was added portionwise. Borohydride addition was accompanied by effervescence and heating of the solution. After 4 hours, at which time the reaction had come to room temperature, the reaction was quenched by addition of saturated sodium bicarbonate and extracted three times with ethyl acetate. The combined organic layers were washed once more with saturated sodium bicarbonate, once with brine, then dried over sodium sulfate and concentrated to an oil. Normal phase chromatography over silica (0-100% ethyl acetate in hexanes) provided the free base as a colorless free-flowing oil. The oil was dissolved in 25 mL of diethyl ether and cooled in an ice water bath, and trifluoroacetic acid (1.2 g, 0.80 mL, 1.7 Eq, 10 mmol) was added dropwise. A voluminous white solid formed, which was filtered and washed rigorously with diethyl ether to provide **6** (1.586 g, 4.976 mmol, 82%) as a fluffy white powder. <sup>1</sup>H NMR (400 MHz, Methanol-*d*<sub>4</sub>) δ 8.09 (d, *J*=8.5 Hz, 2H), 7.62 (d, *J*=8.4 Hz, 2H), 4.39 (s, 2H), 3.92 (s, 3H), 2.8–2.75 (m, 1H), 0.96–0.85 (m, 4H); <sup>13</sup>C NMR (101 MHz, Methanol-*d*<sub>4</sub>) δ 167.74, 137.52, 132.47, 131.24, 131.19, 52.84, 52.36, 31.25, 4.27.

**methyl 4-((N-cyclopropyl-3-oxo-3,4-dihydro-2H-benzo[b][1,4]oxazine-7-carboxamido)methyl)benzoate (8)**

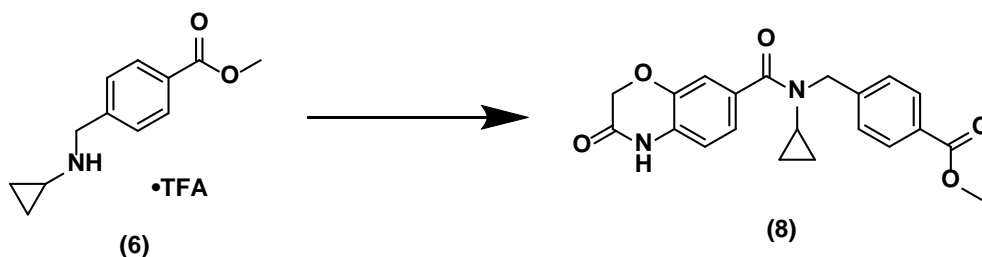

To a flask was added 3-oxo-3,4-dihydro-2*H*-benzo[*b*][1,4]oxazine-7-carboxylic acid (200 mg, 1 Eq, 1.04 mmol), HOAt (211 mg, 1.5 Eq, 1.55 mmol), EDC (298 mg, 1.5 Eq, 1.55 mmol), and acetonitrile (5 mL). The mixture was stirred for 15 minutes at room temperature to preactivate the acid. To the flask was then added **6** (397 mg, 1.2 Eq, 1.24 mmol) and triethylamine (314 mg, 0.43 mL, 3 Eq, 3.11 mmol), and the reaction stirred at room temperature overnight. The next day, the reaction was quenched with water and extracted 3 times with ethyl acetate. The combined organic fractions were washed once with 0.5 M citric acid, once with water, once with saturated sodium bicarbonate, and once with brine, then dried over sodium sulfate, filtered, and concentrated to a white solid. Normal phase chromatography over silica (0-100% ethyl acetate in DCM) provided **8** (292.7 mg, 769.5  $\mu$ mol, 74.3%) as a white solid.  $^1\text{H}$  NMR (400 MHz, Chloroform-*d*)  $\delta$  9.43 (s, 1H), 8.02 (d,  $J=8.3$  Hz, 2H), 7.39 (d,  $J=7.9$  Hz, 2H), 7.19–7.12 (m, 2H), 6.85 (d,  $J=7.8$  Hz, 1H), 4.77 (s, 2H), 4.62 (s, 2H), 3.91 (s, 3H), 2.62 (tt,  $J=6.9, 4.0$  Hz, 1H), 0.67–0.55 (m, 2H), 0.55–0.45 (m, 2H);  $^{13}\text{C}$  NMR (101 MHz, Chloroform-*d*)  $\delta$  167.00, 166.05, 143.15, 132.88, 130.15, 129.83, 129.45, 127.96, 127.69, 122.40, 116.35, 115.76, 67.27, 52.28, 27.02, 10.15. 1 aromatic and 1 aliphatic C not observed.

**4-((N-cyclopropyl-3-oxo-3,4-dihydro-2*H*-benzo[*b*][1,4]oxazine-7-carboxamido)methyl)benzoic acid (10)**

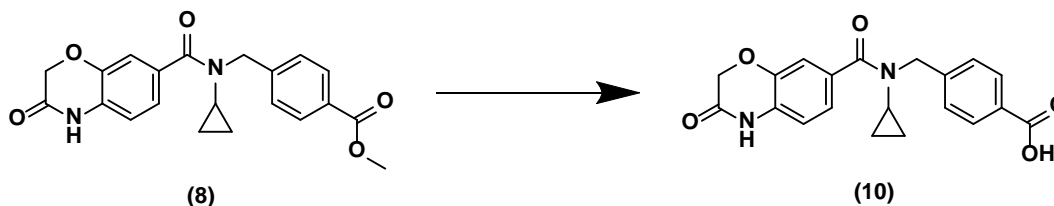

To a round-bottom flask was added **8** (904 mg, 1 Eq, 2.38 mmol), THF (20 mL), and lithium hydroxide hydrate (10% in water, 5 mL, 5 Eq, 11.9 mmol). The reaction was stirred at room temperature for 24 hours, then extracted 5 times with 20 mL portions of diethyl ether. The aqueous layer was then acidified to pH 2 with 1 M  $\text{KHSO}_4$ , and the precipitate produced was filtered off, washed with cold water, and dried to provide **10** (771.1 mg, 2.105 mmol, 88.6%) as a white solid.  $^1\text{H}$  NMR (400 MHz, DMSO-*d*<sub>6</sub>)  $\delta$  10.87 (s, 1H), 7.93 (d,  $J=8.2$  Hz, 2H), 7.41 (d,  $J=8.0$  Hz, 2H), 7.18 (dd,  $J=8.1, 1.8$  Hz, 1H), 7.14 (d,  $J=1.7$  Hz, 1H), 6.92 (d,  $J=8.1$  Hz, 1H), 4.70 (s, 2H), 4.61 (s, 2H), 2.84–2.73 (m, 1H), 0.59–0.49 (m, 2H), 0.49–0.38 (m, 2H).

**N-cyclopropyl-3-oxo-N-(4-(pyrimidin-4-ylcarbamoyl)benzyl)-3,4-dihydro-2H-benzo[b][1,4]oxazine-7-carboxamide (UNC6934 (1))**

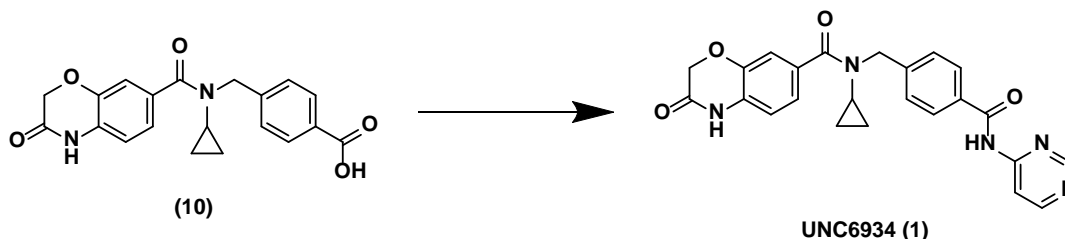

To a 2-dram vial with a stirbar was added pyrimidin-4-amine (50.6 mg, 1.3 Eq, 532  $\mu\text{mol}$ ), **10** (150 mg, 1 Eq, 409  $\mu\text{mol}$ ), 1-methylimidazole (118 mg, 114  $\mu\text{L}$ , 3.5 Eq, 1.43 mmol), THF (1.5 mL), and finally TCFH (149 mg, 1.3 Eq, 532  $\mu\text{mol}$ ). The reaction was left to stir at room temperature for 24 hours, then quenched with 25 mL of distilled water and extracted 7 times with 25 mL portions of ethyl acetate. The combined organic layers were extracted once with 15 mL of saturated sodium bicarbonate (for recovery of the starting acid), then washed twice with water, once with saturated sodium bicarbonate, and once with brine, and finally dried over anhydrous sodium sulfate and concentrated to a yellow oil. The oil was dry-loaded on Celite and purified by normal phase chromatography over silica (0-10% methanol in DCM) to yield UNC6934 (**1**) (106 mg, 239  $\mu\text{mol}$ , 58.4%) as an off-white solid.  $^1\text{H}$  NMR (400 MHz,  $\text{DMSO-}d_6$ )  $\delta$  11.21 (s, 1H), 10.87 (s, 1H), 8.95 (d,  $J=1.4$  Hz, 1H), 8.72 (d,  $J=5.8$  Hz, 1H), 8.21 (dd,  $J=5.8, 1.3$  Hz, 1H), 8.03 (d,  $J=8.3$  Hz, 2H), 7.45 (d,  $J=8.0$  Hz, 2H), 7.19 (dd,  $J=8.0, 1.8$  Hz, 1H), 7.15 (d,  $J=1.7$  Hz, 1H), 6.93 (d,  $J=8.1$  Hz, 1H), 4.72 (s, 2H), 4.62 (s, 2H), 2.88–2.77 (m, 1H), 0.61–0.50 (m, 2H), 0.50–0.41 (m, 2H);  $^{13}\text{C}$  NMR (100 MHz,  $\text{DMSO-}d_6$ )  $\delta$  166.90, 164.85, 158.30, 158.26, 158.17, 143.21, 142.48, 132.03, 131.73, 128.63, 128.40, 127.16, 121.90, 115.39, 115.14, 110.65, 66.73, 9.54. 1 aromatic C and 2 aliphatic C not observed; HRMS ( $m/z$ ):  $[\text{M}+\text{H}]^+$  calculated for  $\text{C}_{24}\text{H}_{22}\text{N}_5\text{O}_4$ , 444.16663; found, 444.16638.

**methyl 4-((isopropylamino)methyl)benzoate trifluoroacetate salt (7)**

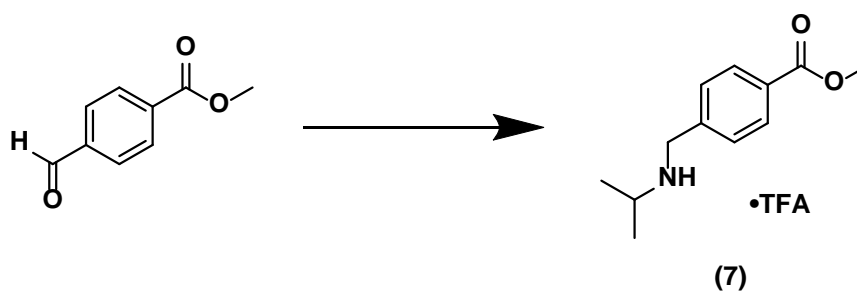

To a 50 mL flask equipped with a stir bar was added methyl 4-formylbenzoate (0.50 g, 1 Eq, 3.0 mmol) and methanol (5 mL), followed by isopropylamine (0.18 g, 0.26 mL, 1 Eq, 3.0 mmol). The flask was capped and stirred at room temperature overnight. The next day, the flask was cooled in an ice water bath and sodium borohydride (0.23 g, 2 Eq, 6.1 mmol) was added portionwise. Borohydride addition was accompanied by effervescence and heating of the solution. After 4 hours, at which time the reaction had come to room temperature, the reaction was quenched by addition of saturated sodium bicarbonate and extracted three times with ethyl acetate. The combined organic layers were washed once more with saturated sodium bicarbonate, once with brine, then dried over sodium sulfate and concentrated to an oil. Normal phase chromatography over silica (0-100% ethyl acetate in hexanes) provided the free base as a colorless free-flowing oil. The oil was dissolved in 25 mL of diethyl ether and cooled in an ice water bath, and trifluoroacetic acid (0.52 g, 0.35 mL, 1.5 Eq, 4.6 mmol) was added dropwise. A voluminous white solid formed, which was filtered and washed rigorously with diethyl ether to provide **7** (773.4 mg, 2.407 mmol, 79%) as a fluffy white powder. <sup>1</sup>H NMR (400 MHz, Methanol-*d*<sub>4</sub>) δ 8.10 (d, *J*=8.4 Hz, 2H), 7.62 (d, *J*=8.6 Hz, 2H), 4.29 (s, 2H), 3.92 (s, 3H), 3.53–3.42 (m, 1H), 1.41 (d, *J*=6.6 Hz, 6H); <sup>13</sup>C NMR (100 MHz, Methanol-*d*<sub>4</sub>) δ 167.75, 137.93, 132.38, 131.23, 131.01, 52.83, 52.23, 49.15, 19.21.

**methyl 4-((N-isopropyl-3-oxo-3,4-dihydro-2H-benzo[b][1,4]oxazine-7-carboxamido)methyl)benzoate (9)**

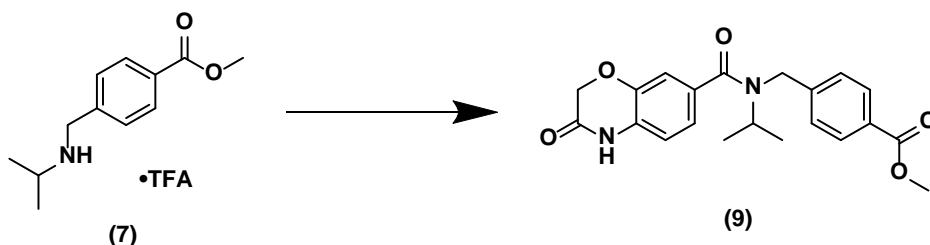

To a scintillation vial was added 3-oxo-3,4-dihydro-2H-benzo[b][1,4]oxazine-7-carboxylic acid (50 mg, 1 Eq, 0.26 mmol), EDC (87 mg, 1.75 Eq, 0.45 mmol), HOAt (70 mg, 2 Eq, 0.52 mmol), and acetonitrile (2.0 mL). The reaction was left to stir at room temperature for 30 minutes. To the vial was then added **7** (0.10 g, 1.2 Eq, 0.31 mmol), followed by triethylamine (0.10 g, 0.14 mL, 4 Eq, 1.0 mmol), and the reaction was left to stir overnight. The next day, the volatiles were removed under reduced pressure and the residue was partitioned between water and ethyl acetate. The layers were separated, and the aqueous layer was extracted twice more with ethyl acetate. The combined organic layers were washed once with 0.5 M citric acid, once with water, once with saturated sodium bicarbonate, and once with brine, then dried over sodium sulfate and concentrated to an off-white residue. Normal phase chromatography over silica gel (0-100% ethyl acetate in DCM) provided **9** (90.1 mg, 236 μmol, 91%) as a white solid. <sup>1</sup>H NMR (400 MHz, Chloroform-

*d*)  $\delta$  9.58 (s, 1H), 8.01–7.94 (m, 2H), 7.36 (br s, 2H), 7.01 (d,  $J=15.7$  Hz, 2H), 6.84 (br s, 1H), 4.65 (s, 2H), 4.61 (s, 2H), 4.21 (s, 1H), 3.89 (s, 3H), 1.13 (d,  $J=6.6$  Hz, 6H);  $^{13}\text{C}$  NMR (100 MHz, Chloroform-*d*)  $\delta$  171.38, 167.02, 165.94, 144.52, 143.57, 132.68, 129.94, 128.97, 127.48, 126.93, 121.00, 116.31, 115.19, 67.21, 52.21, 21.43, 14.29. 1 aliphatic C not observed.

**4-((N-isopropyl-3-oxo-3,4-dihydro-2H-benzo[b][1,4]oxazine-7-carboxamido)methyl)benzoic acid (11)**

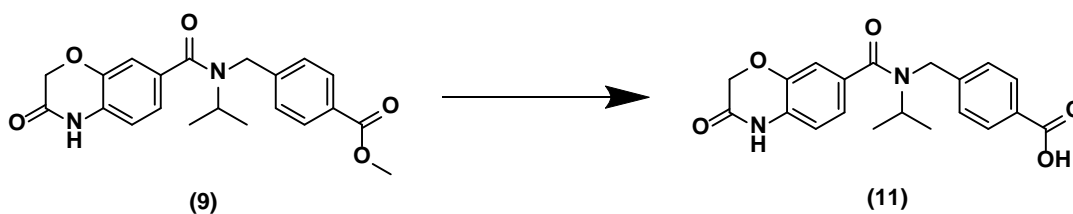

To a round-bottom flask was added **9** (405 mg, 1 Eq, 1.06 mmol), 1,4-dioxane (6 mL), and lithium hydroxide hydrate (15% in water, 1.5 mL, 5 Eq, 5.30 mmol). The reaction was stirred at room temperature for 24 hours, then extracted 5 times with 20 mL portions of diethyl ether. The aqueous layer was then acidified to pH 2 with 1 M  $\text{KHSO}_4$ , and the precipitate produced was filtered off, washed with cold water, and dried to provide **11** (319.8 mg, 868.1  $\mu\text{mol}$ , 82.0%) as a white solid.  $^1\text{H}$  NMR (400 MHz,  $\text{DMSO-}d_6$ )  $\delta$  10.85 (s, 1H), 7.89 (d,  $J=8.2$  Hz, 2H), 7.41 (d,  $J=7.7$  Hz, 2H), 7.03 (s, 2H), 6.99–6.89 (m, 1H), 4.61 (s, 4H), 4.08 (s, 1H), 1.08 (d,  $J=6.6$  Hz, 6H).

**N-isopropyl-3-oxo-N-(4-(pyrimidin-4-ylcarbamoyl)benzyl)-3,4-dihydro-2H-benzo[b][1,4]oxazine-7-carboxamide (UNC7145(4))**

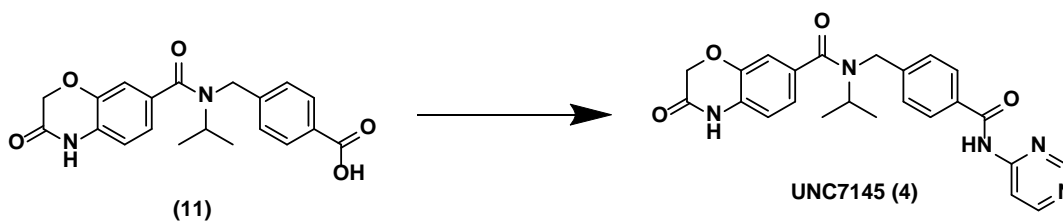

To a 2-dram vial with a stirbar was added pyrimidin-4-amine (33.6 mg, 1.3 Eq, 353  $\mu\text{mol}$ ), **11** (100 mg, 1 Eq, 271  $\mu\text{mol}$ ), 1-methylimidazole (78.0 mg, 75.7  $\mu\text{L}$ , 3.5 Eq, 950  $\mu\text{mol}$ ), acetonitrile (1.0 mL), and finally TCFH (99.0 mg, 1.3 Eq, 353  $\mu\text{mol}$ ). The reaction was heated to 40  $^\circ\text{C}$  for 16 hours, then quenched with 25 mL of distilled water and extracted 6 times with 25 mL portions of ethyl acetate. The combined organic layers were extracted once with 15 mL of saturated sodium bicarbonate (for recovery of the starting

acid), then washed twice with water, once with saturated sodium bicarbonate, and once with brine, and finally dried over anhydrous sodium sulfate and concentrated to a yellow oil. The oil was dry-loaded on Celite and purified by normal phase chromatography over silica (0-10% methanol in DCM) to yield UNC7145 (**4**) (52 mg, 0.12 mmol, 43%) as an off-white solid.  $^1\text{H NMR}$  (400 MHz,  $\text{DMSO-}d_6$ )  $\delta$  11.18 (s, 1H), 10.86 (s, 1H), 8.95 (d,  $J=1.3$  Hz, 1H), 8.71 (d,  $J=5.8$  Hz, 1H), 8.21 (dd,  $J=5.8, 1.3$  Hz, 1H), 7.98 (d,  $J=8.4$  Hz, 2H), 7.51–7.39 (m, 2H), 7.10–6.99 (m, 2H), 6.96 (s, 1H), 4.69–4.54 (m, 4H), 4.16–4.03 (m, 1H), 1.10 (d,  $J = 6.6$  Hz, 6H);  $^{13}\text{C NMR}$  (101 MHz,  $\text{DMSO-}d_6$ )  $\delta$  170.23, 166.97, 164.78, 158.29, 158.27, 158.21, 144.61, 143.00, 131.76, 131.58, 128.36, 128.16, 126.58, 120.54, 115.76, 114.27, 110.67, 66.76, 50.47, 42.82, 20.74; HRMS ( $m/z$ ):  $[\text{M}+\text{H}]^+$  calculated for  $\text{C}_{24}\text{H}_{24}\text{N}_5\text{O}_4$ , 446.18228; found, 446.18216.

**tert-butyl 4-(4-((N-cyclopropyl-3-oxo-3,4-dihydro-2H-benzo[b][1,4]oxazine-7-carboxamido)methyl)benzamido)benzoate (**12**)**

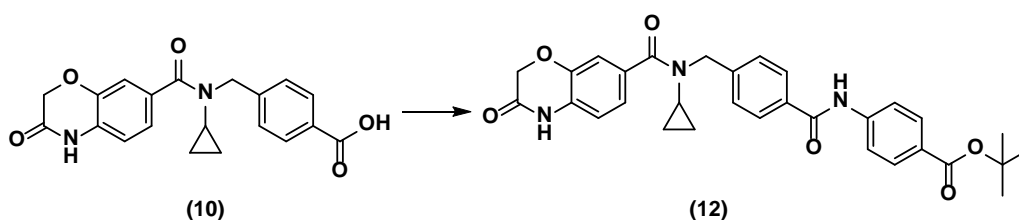

To a scintillation vial was added **10** (18 mg, 1 Eq, 50  $\mu\text{mol}$ ), *tert*-butyl 4-aminobenzoate (19 mg, 2 Eq, 0.10 mmol), EDC (19 mg, 2 Eq, 0.10 mmol), DMAP (12 mg, 2 Eq, 0.10 mmol), and DMF (0.2 mL). The reaction was heated to 50  $^\circ\text{C}$  and stirred overnight. The next day, the reaction was partitioned between water and ethyl acetate. The layers were separated, and the aqueous layer was extracted twice more with ethyl acetate. The combined organic layers were washed twice with water, once with saturated sodium bicarbonate, and once with brine, then dried over sodium sulfate and concentrated to an off-white residue. Purification by normal phase chromatography over silica (0-100% ethyl acetate in DCM) provided **12** (20 mg, 37  $\mu\text{mol}$ , 74%) as a white solid.  $^1\text{H NMR}$  (400 MHz,  $\text{Chloroform-}d$ )  $\delta$  9.25 (s, 1H), 8.83 (s, 1H), 7.94 (d,  $J=8.7$  Hz, 2H), 7.84 (d,  $J=8.3$  Hz, 2H), 7.77 (d,  $J=8.8$  Hz, 2H), 7.31 (d,  $J=7.9$  Hz, 2H), 7.09 (s, 1H), 7.07 (d,  $J=8.1$  Hz, 1H), 6.79 (d,  $J=8.0$  Hz, 1H), 4.75 (s, 2H), 4.59 (s, 2H), 2.63 (tt,  $J=7.0, 4.0$  Hz, 1H), 1.59 (s, 9H), 0.66–0.56 (m, 2H), 0.56–0.44 (m, 2H);  $^{13}\text{C NMR}$  (100 MHz,  $\text{Chloroform-}d$ )  $\delta$  165.95, 165.68, 165.60, 143.15, 142.29, 141.99, 134.02, 132.57, 130.65, 127.95, 127.84, 127.64, 122.21, 119.43, 116.13, 115.81, 81.09, 67.29, 28.37. 2 aromatic C and 3 aliphatic C not observed.



**4-(4-((N-cyclopropyl-3-oxo-3,4-dihydro-2H-benzo[b][1,4]oxazine-7-carboxamido)methyl)benzamido)benzoic acid (13)**

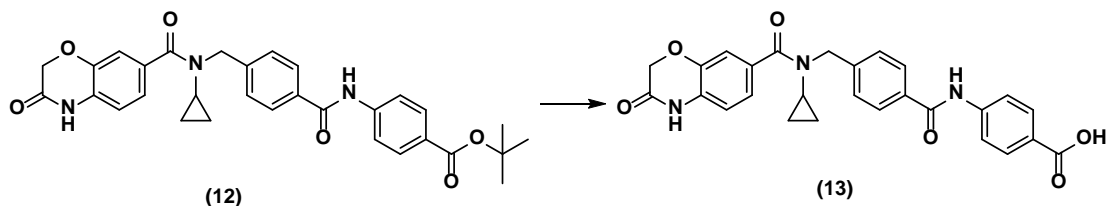

To a vial containing **12** (155 mg, 1 Eq, 286  $\mu\text{mol}$ ) was added DCM (1.3 mL) and TFA (489 mg, 331  $\mu\text{L}$ , 15 Eq, 4.29 mmol), which were stirred at room temperature overnight. The next day, the volatiles were removed *in vacuo* to provide **13** (144 mg, 297  $\mu\text{mol}$ , quantitative) as a tan solid.  $^1\text{H}$  NMR (400 MHz,  $\text{DMSO-}d_6$ )  $\delta$  10.87 (s, 1H), 10.52 (s, 1H), 7.98–7.89 (m, 6H), 7.47 (d,  $J=8.1$  Hz, 2H), 7.18 (d,  $J=8.3$  Hz, 1H), 7.15 (d,  $J=1.8$  Hz, 1H), 6.93 (d,  $J=8.1$  Hz, 1H), 4.72 (s, 2H), 4.62 (s, 2H), 2.84–2.75 (m, 1H), 0.59–0.51 (m, 2H), 0.51–0.43 (m, 2H).

**N-cyclopropyl-3-oxo-N-(4-((4-((37-oxo-41-((3aS,4S,6aR)-2-oxohexahydro-1H-thieno[3,4-d]imidazol-4-yl)-3,6,9,12,15,18,21,24,27,30,33-undeca-oxa-36-azahentetracontyl)carbamoyl)phenyl)carbamoyl)benzyl)-3,4-dihydro-2H-benzo[b][1,4]oxazine-7-carboxamide (UNC7096 (5))**

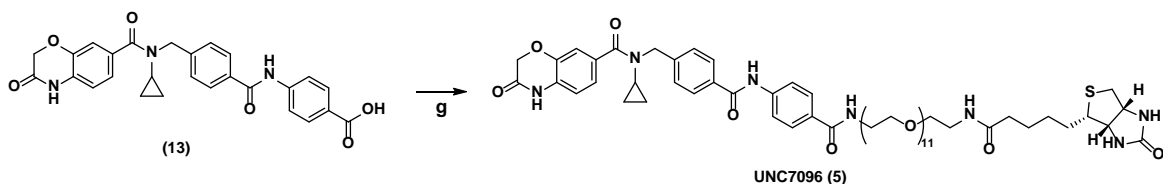

To a scintillation vial was added **13** (3.1 mg, 1 Eq, 6.5  $\mu\text{mol}$ ), EDC (2.5 mg, 2 Eq, 13  $\mu\text{mol}$ ), HOAt (1.8 mg, 2 Eq, 13  $\mu\text{mol}$ ), and DMF (0.2 mL). The reaction was left to stir at room temperature for 30 minutes. To the vial was then added Biotin-PEG11-amine (5.0 mg, 1 Eq, 6.5  $\mu\text{mol}$ ) dissolved in DMF (0.2 mL), followed by DIPEA (2.5 mg, 3.4  $\mu\text{L}$ , 3 Eq, 19  $\mu\text{mol}$ ), and the reaction was left to stir overnight. The next day, the reaction was diluted with distilled water and purified directly by reverse phase chromatography (10-100% methanol in water + 0.1% TFA) and lyophilized to provide UNC7096 (**5**) (6.51 mg, 5.26  $\mu\text{mol}$ , 81%) as a white hygroscopic solid.  $^1\text{H}$  NMR (400 MHz,  $\text{Methanol-}d_4$ )  $\delta$  7.97 (d,  $J=8.3$  Hz, 2H), 7.90–7.83 (m, 4H), 7.51 (d,  $J=7.9$  Hz, 2H), 7.20 (d,  $J=8.6$  Hz, 1H), 7.18–7.16 (m, 1H), 6.97 (d,  $J=8.1$  Hz, 1H), 4.83 (s, 2H), 4.63 (s, 2H), 4.48 (ddd,  $J=7.9, 5.0, 0.9$  Hz, 1H), 4.29 (dd,  $J=7.9, 4.5$  Hz, 1H), 3.71–3.55 (m, 40H), 3.53 (t,  $J=5.4$  Hz, 2H), 3.37–3.33 (m, 2H), 3.19 (dt,  $J=9.8, 5.3$  Hz, 1H), 2.92 (dd,  $J=12.8, 5.0$  Hz, 1H), 2.86–2.80 (m, 1H), 2.70 (d,  $J=12.8$  Hz, 1H), 2.21 (t,  $J=7.4$  Hz, 2H), 1.78–1.53 (m, 5H), 1.43 (p,  $J=7.6$  Hz, 2H),

0.66 (d,  $J=6.5$  Hz, 2H), 0.57 (s, 2H). PEG group underintegrates slightly; LRMS ( $m/z$ ):  $[M+H]^+$  calculated for  $C_{61}H_{88}N_7O_{18}S$ , 1238.59; found, 1238.40; HRMS ( $m/z$ ):  $[M+H]^+$  calculated for  $C_{61}H_{88}N_7O_{18}S$ , 1238.5901; found, 1238.5924.

## References

1. Beutner, G. L. *et al.* TCFH-NMI: Direct Access to N-Acyl Imidazoliums for Challenging Amide Bond Formations. *Org. Lett.* **20**, 4218–4222 (2018).

Compound Spectra and QC data:

MRT866 (2) Purchased from Enamine (Cat. No. Z357319716)

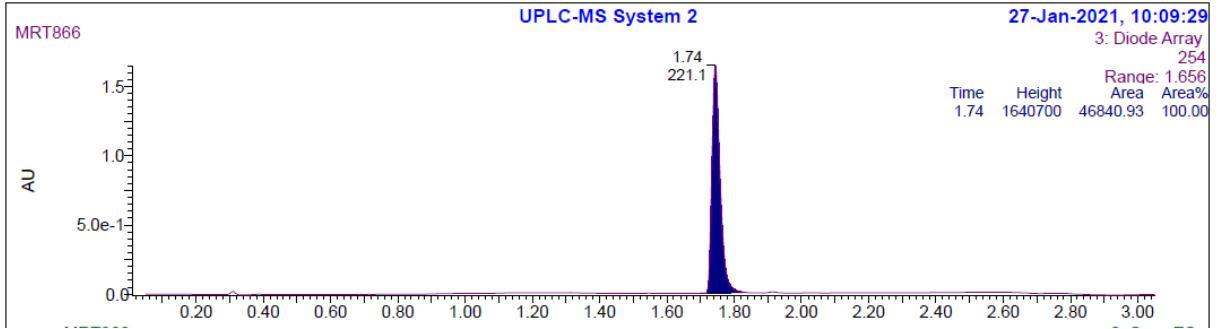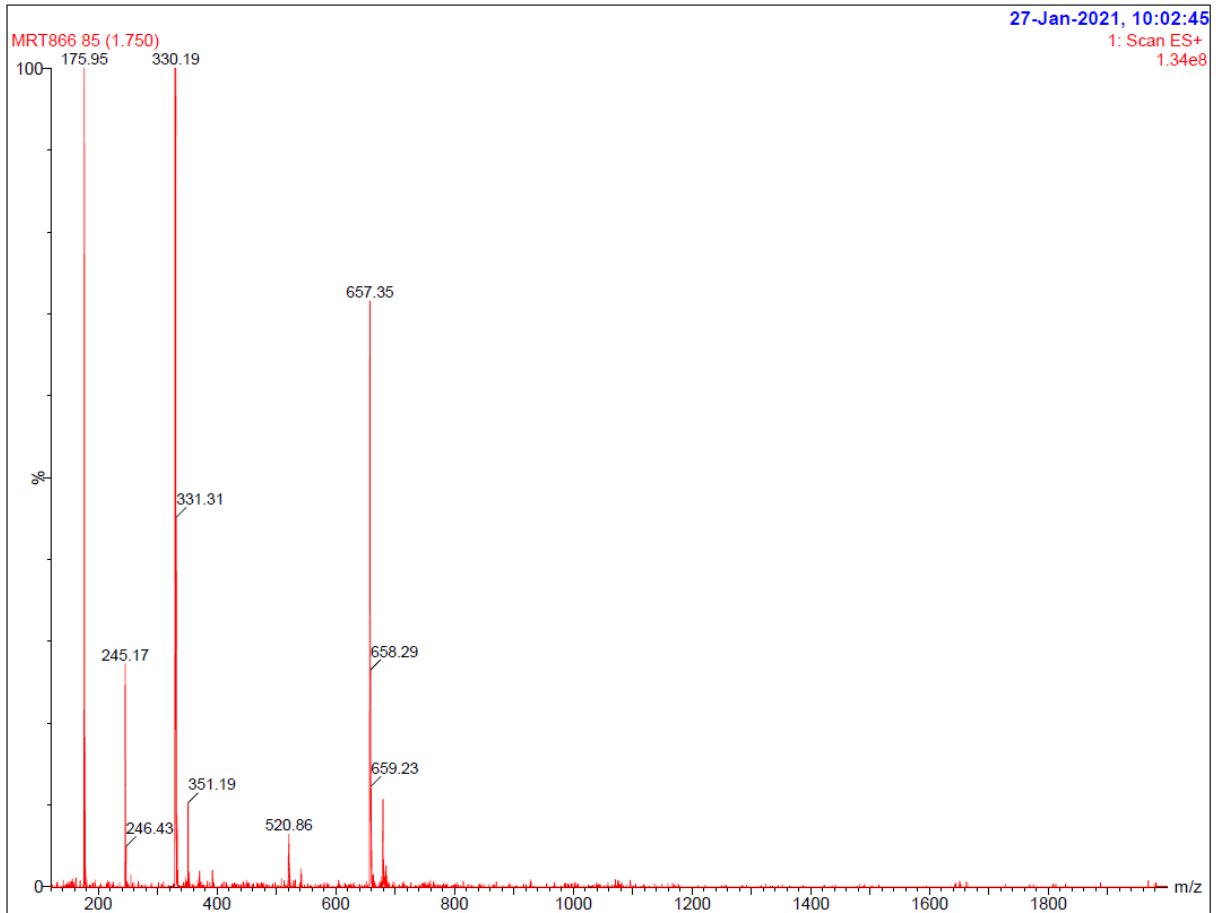

(6): <sup>1</sup>H-NMR and <sup>13</sup>C-NMR in CD<sub>3</sub>OD

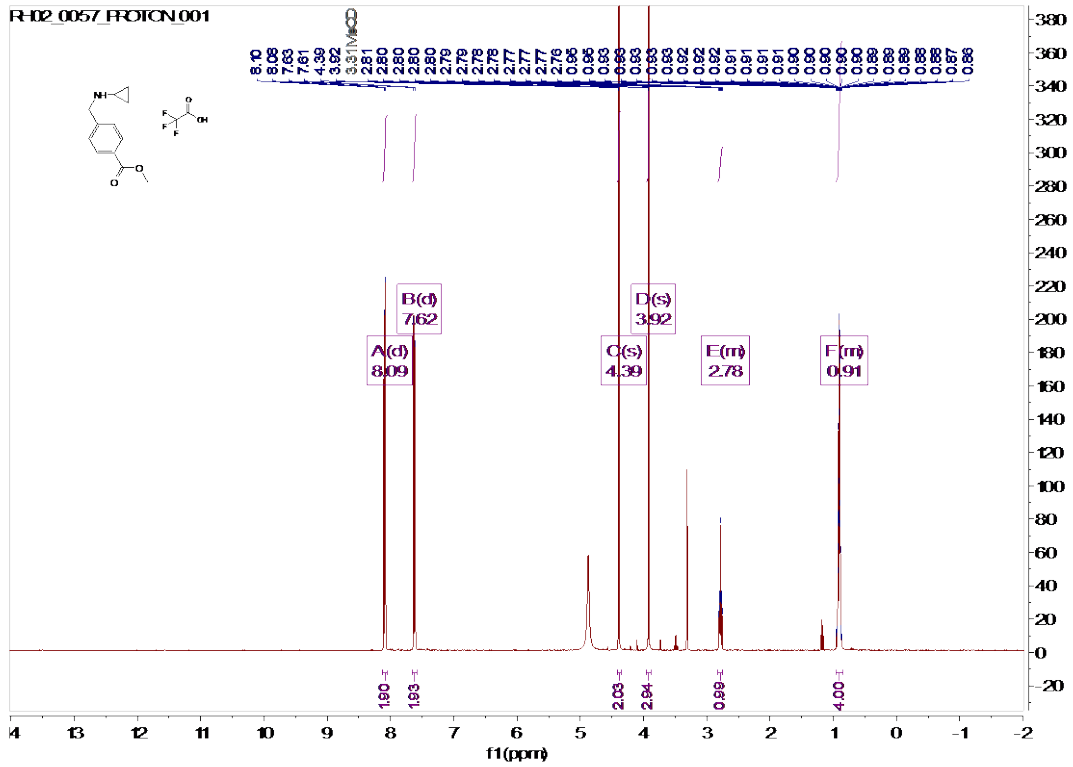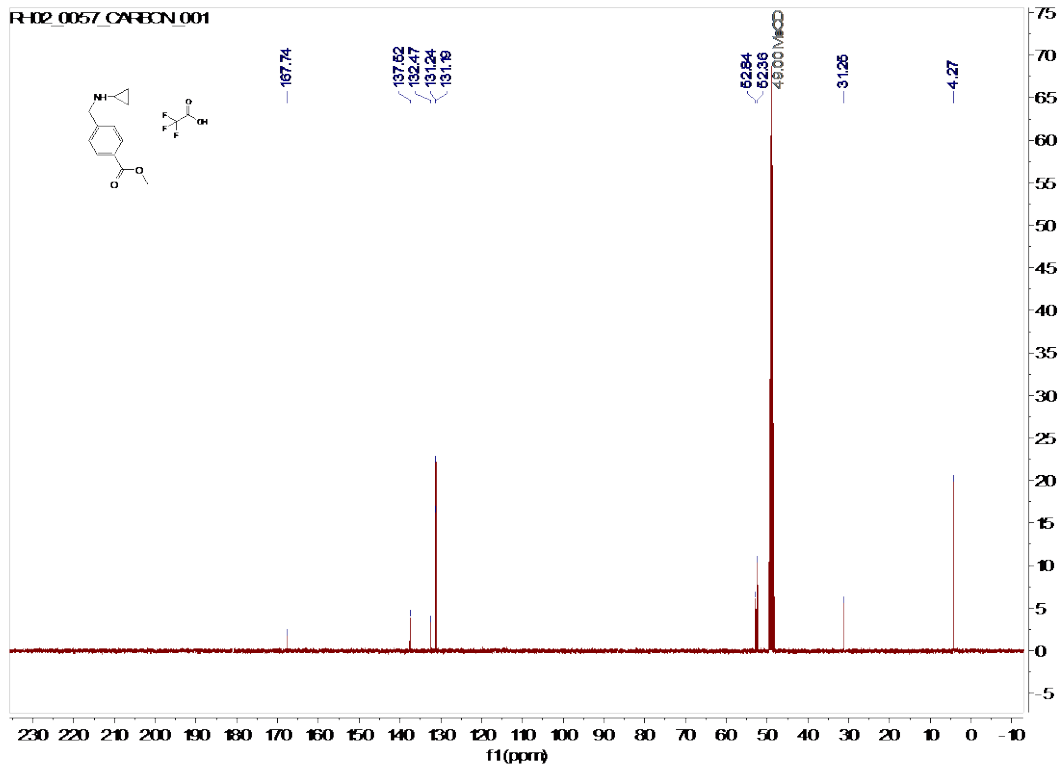

(8): <sup>1</sup>H-NMR and <sup>13</sup>C-NMR in CDCl<sub>3</sub>

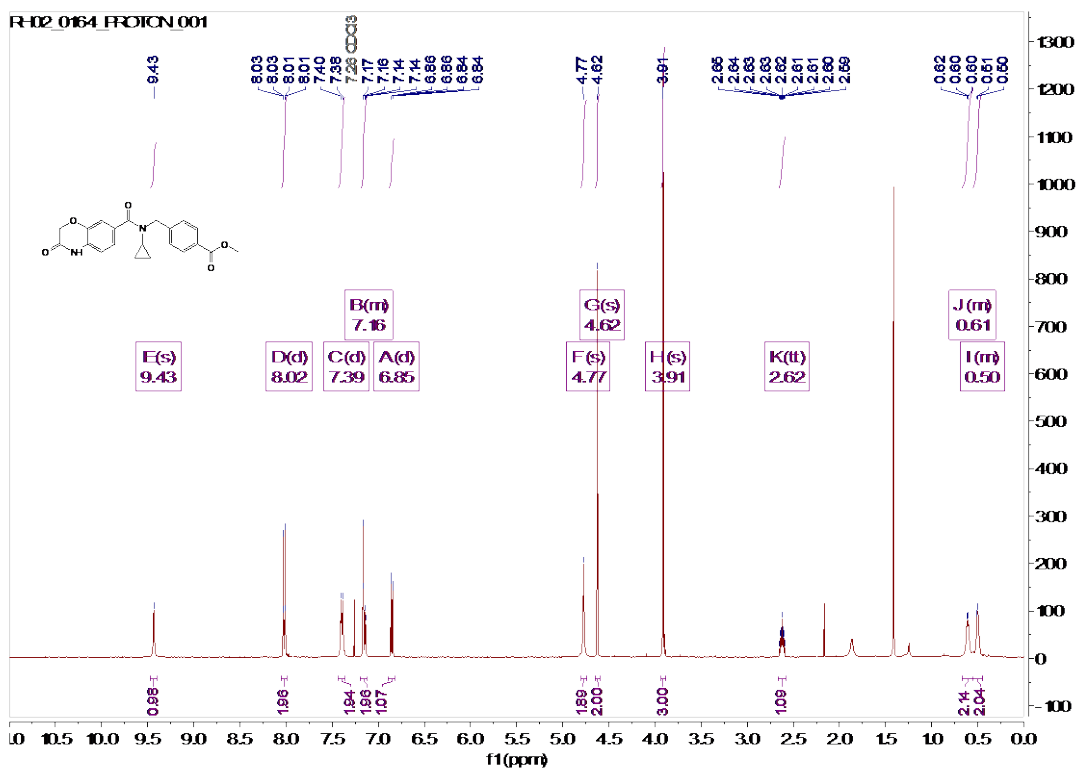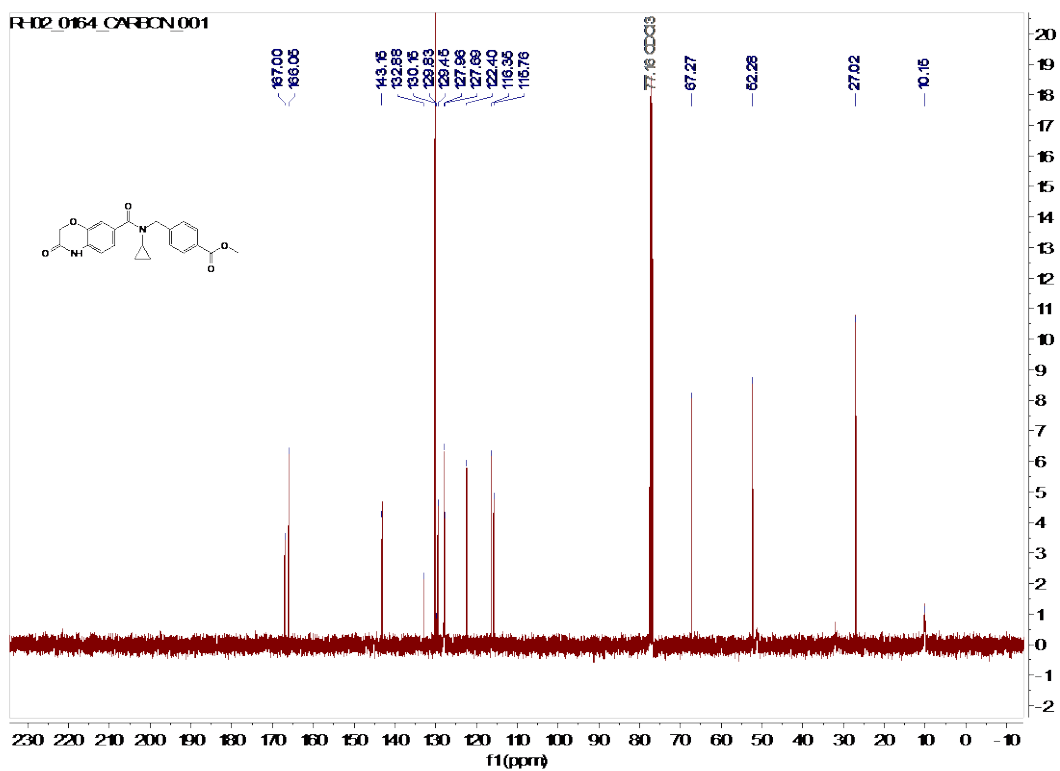

(10): <sup>1</sup>H-NMR in DMSO-d<sub>6</sub>

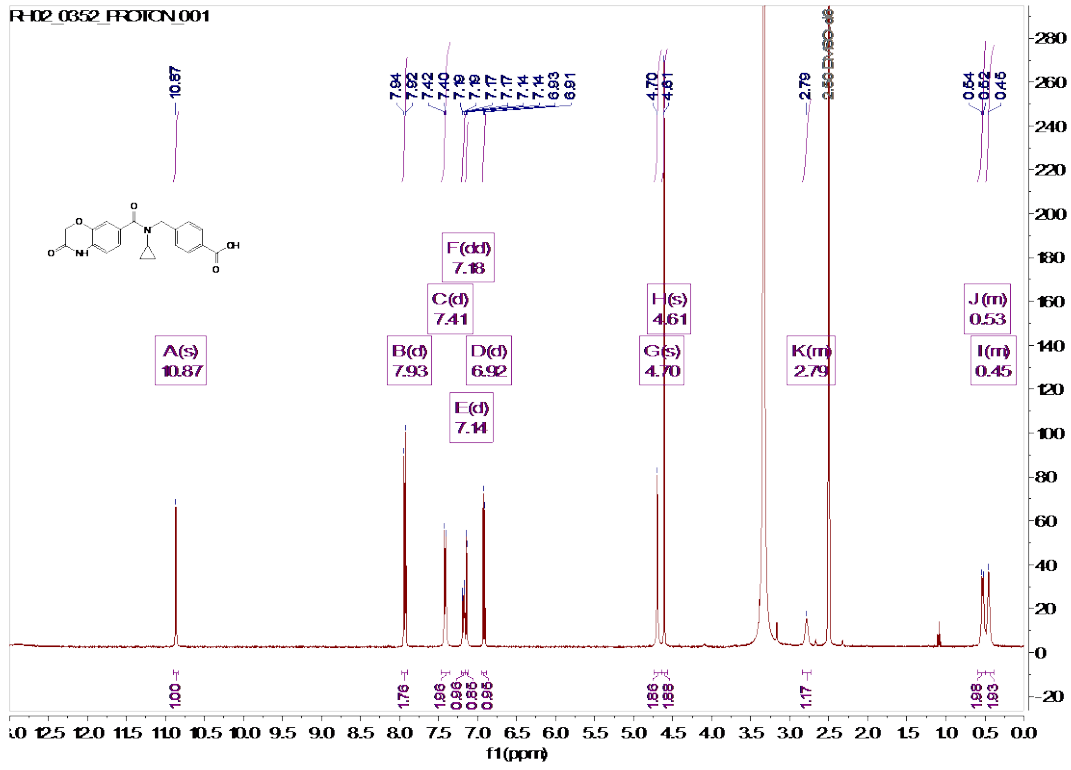

UNC6934 (1): <sup>1</sup>H-NMR and <sup>13</sup>C-NMR in DMSO-d<sub>6</sub>

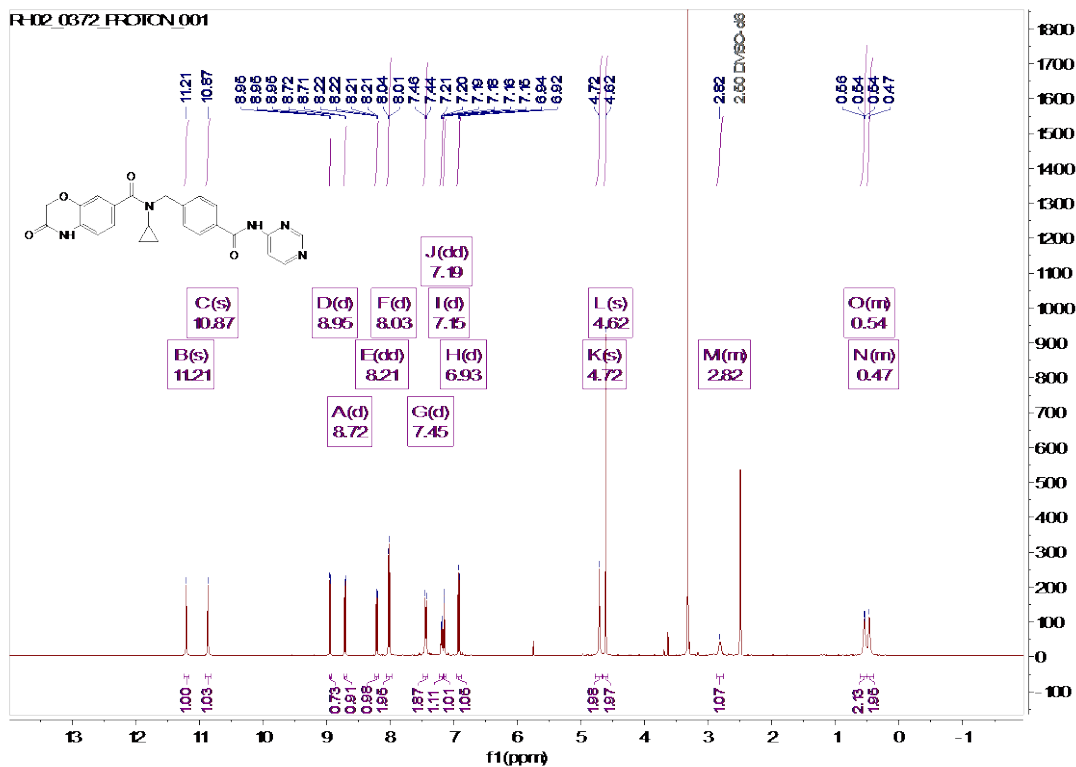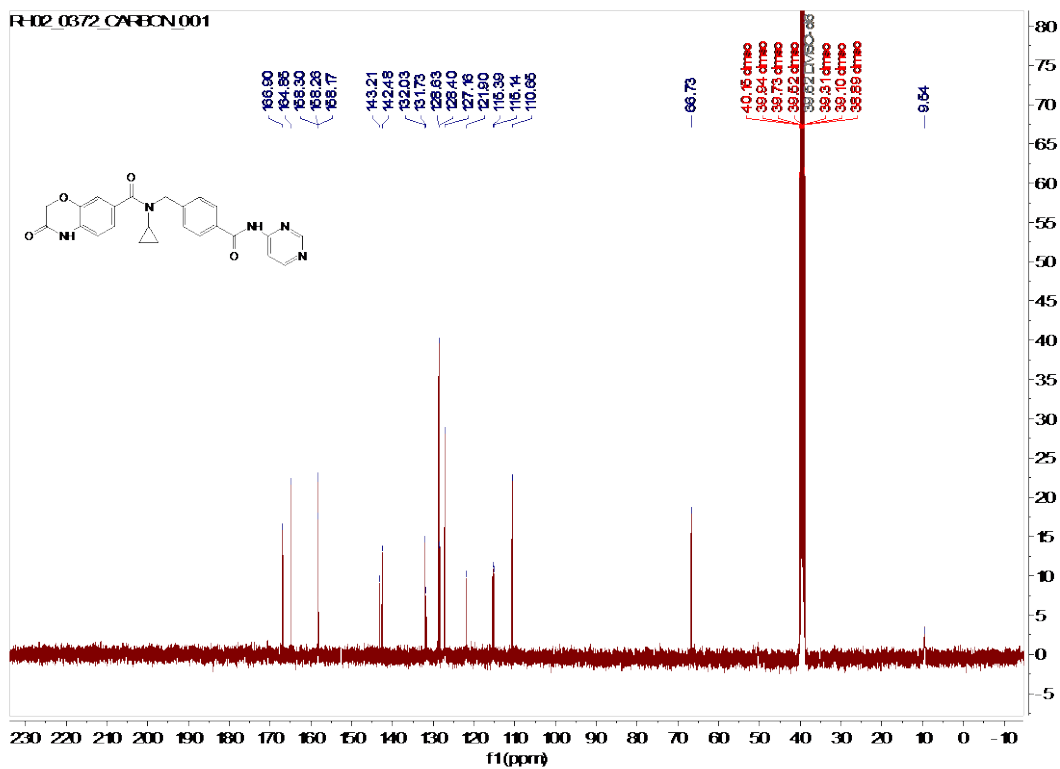

## UNC6934 (1): LCMS trace

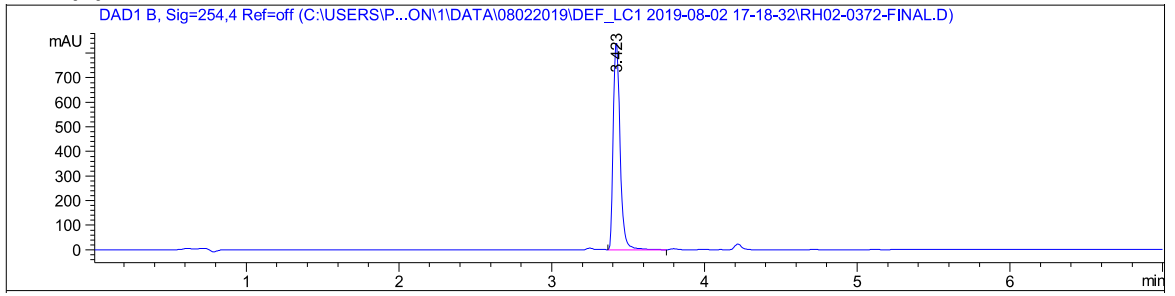

## UNC6934 (1): HRMS spectrum

RH-372 #359-406 RT: 3.41-3.85 AV: 24 NL: 6.17E7  
T: FTMS + c ESI Full ms [130.0000-600.0000]

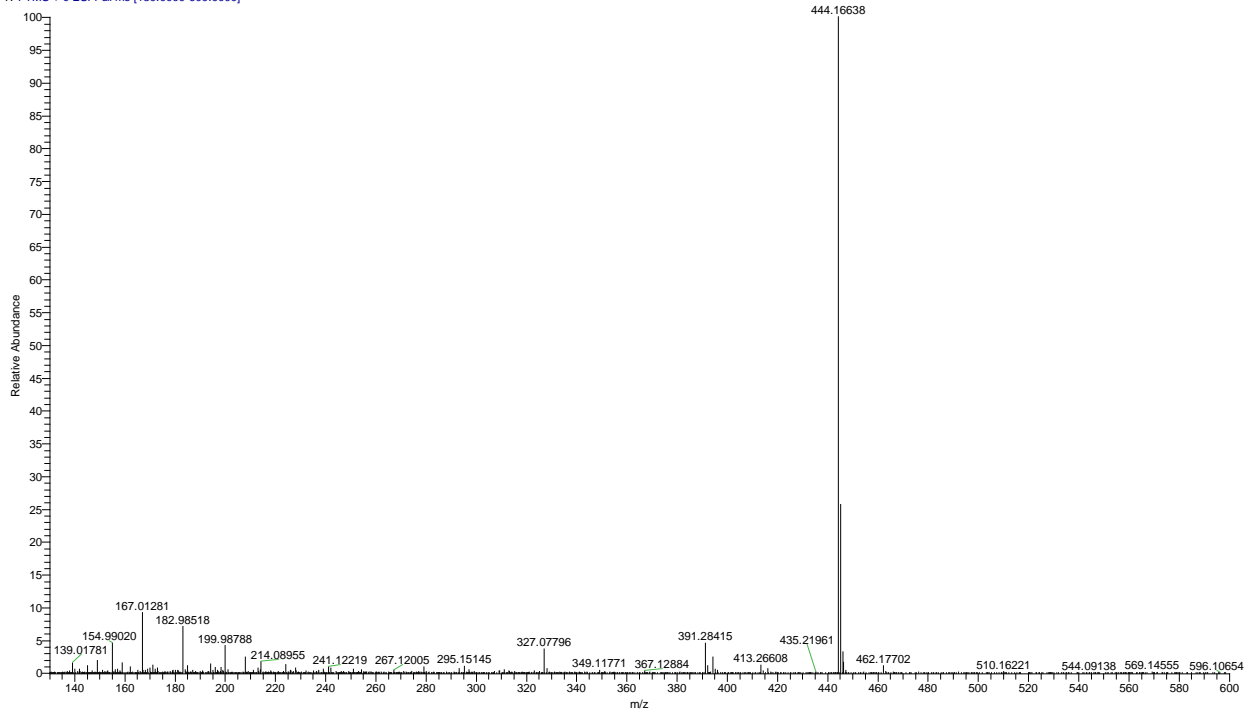



(7): <sup>1</sup>H-NMR and <sup>13</sup>C-NMR in CD<sub>3</sub>OD

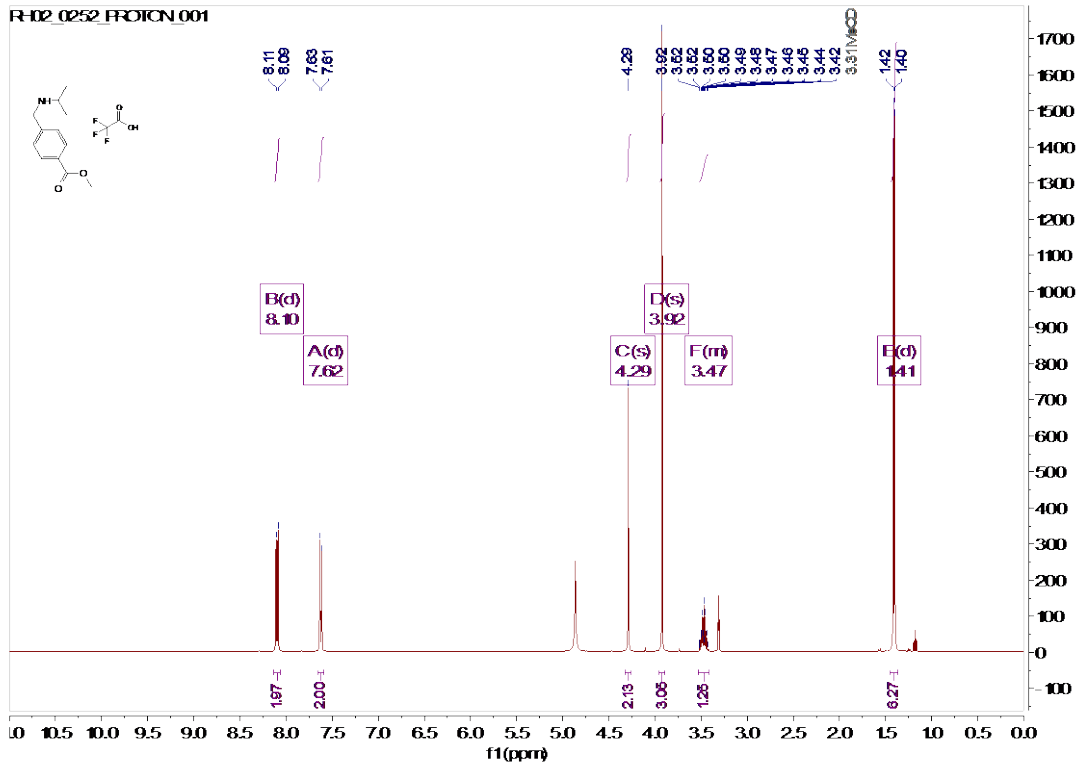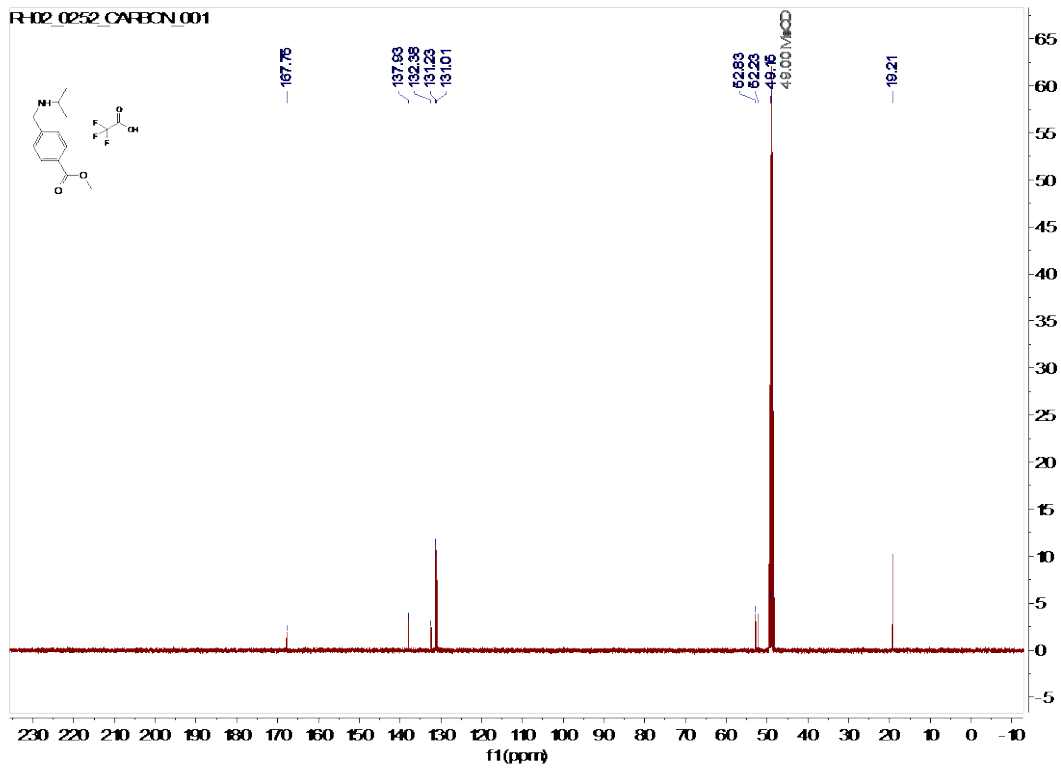

(9): <sup>1</sup>H-NMR and <sup>13</sup>C-NMR in CDCl<sub>3</sub>

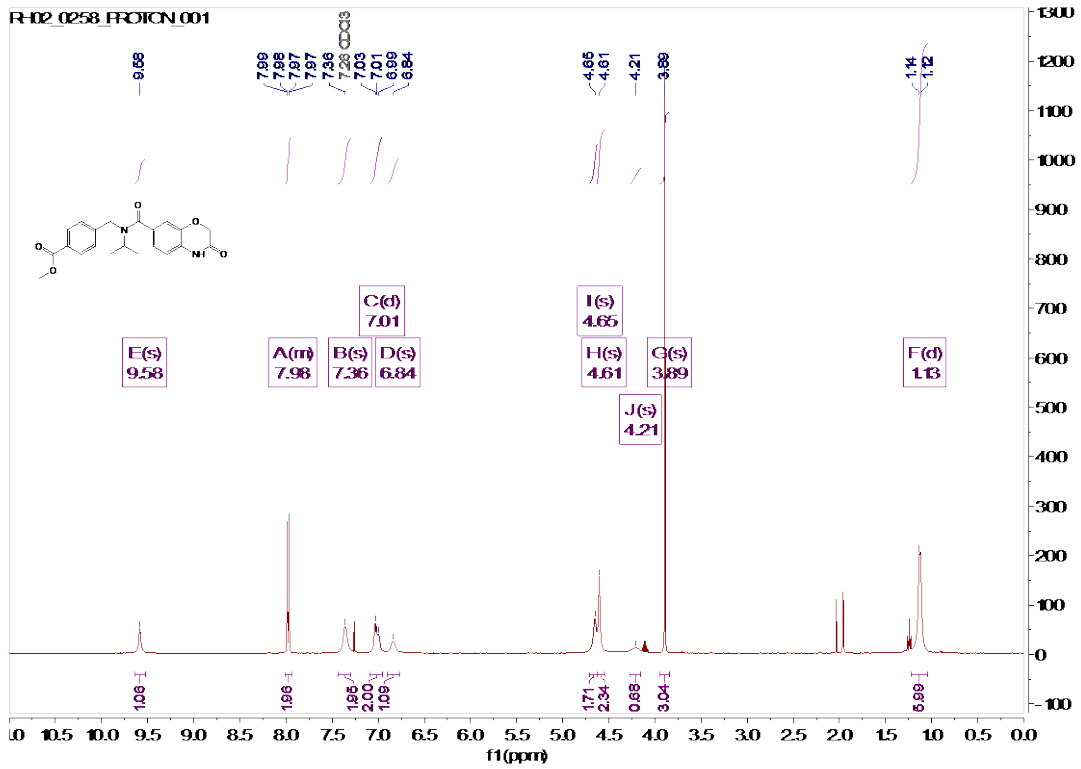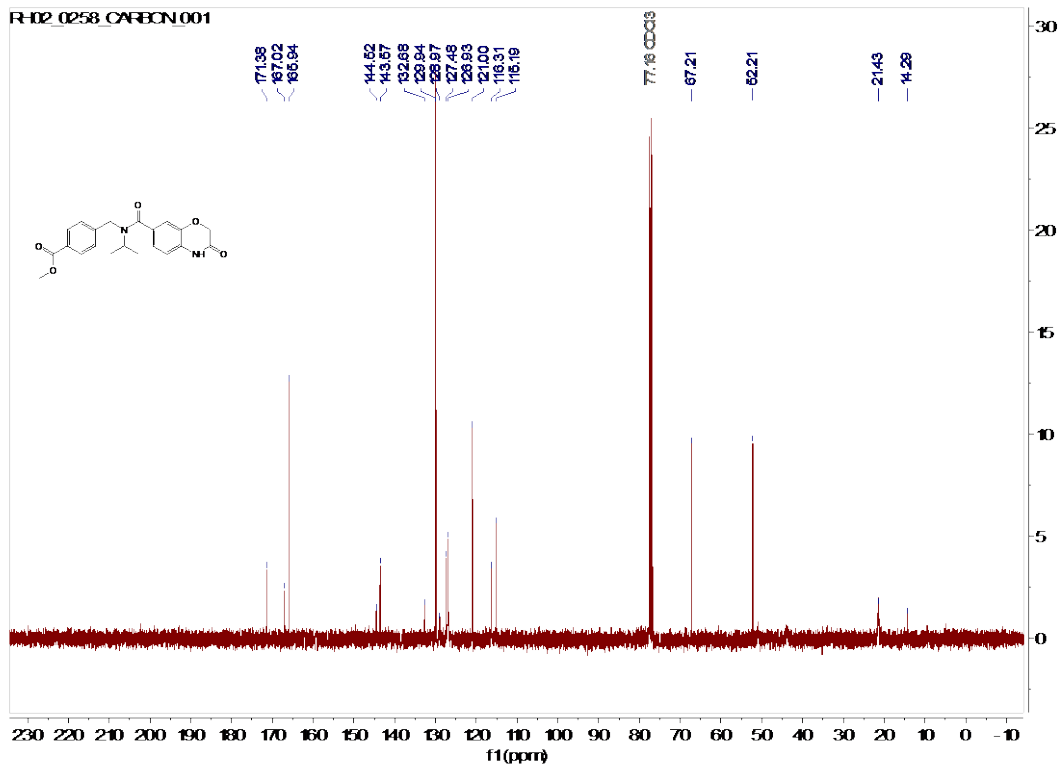

(11): <sup>1</sup>H-NMR and in DMSO-d<sub>6</sub>

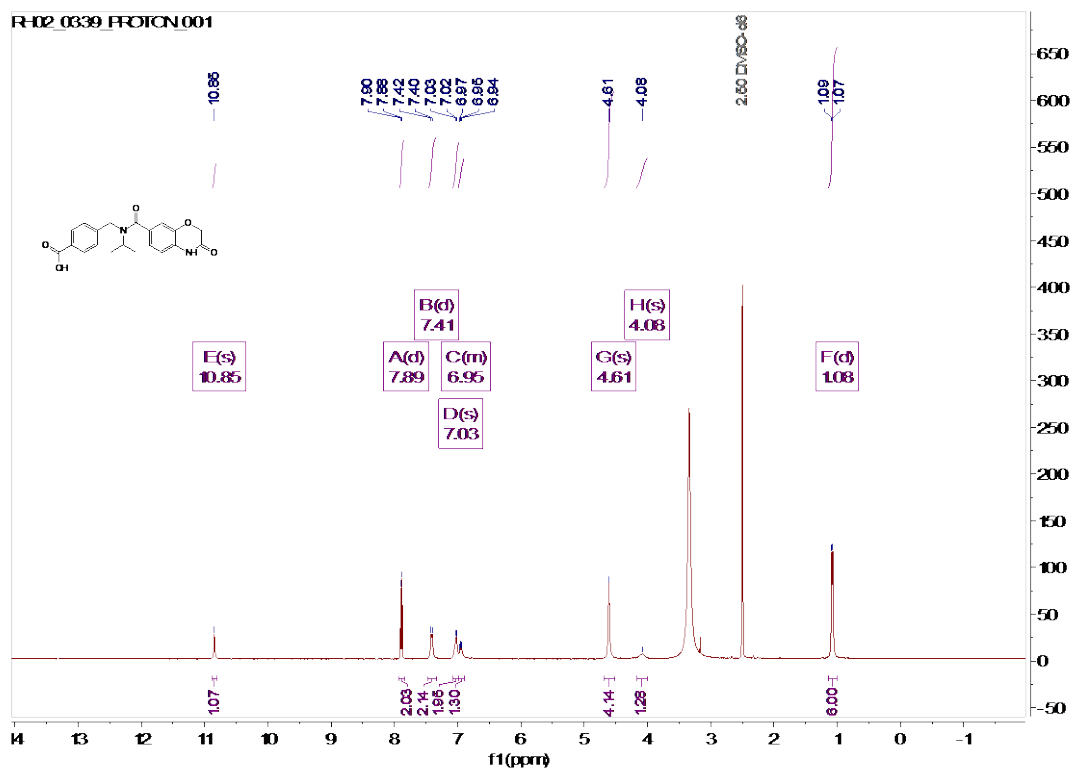

UNC7145 (4): <sup>1</sup>H-NMR and <sup>13</sup>C-NMR in DMSO-d<sub>6</sub>

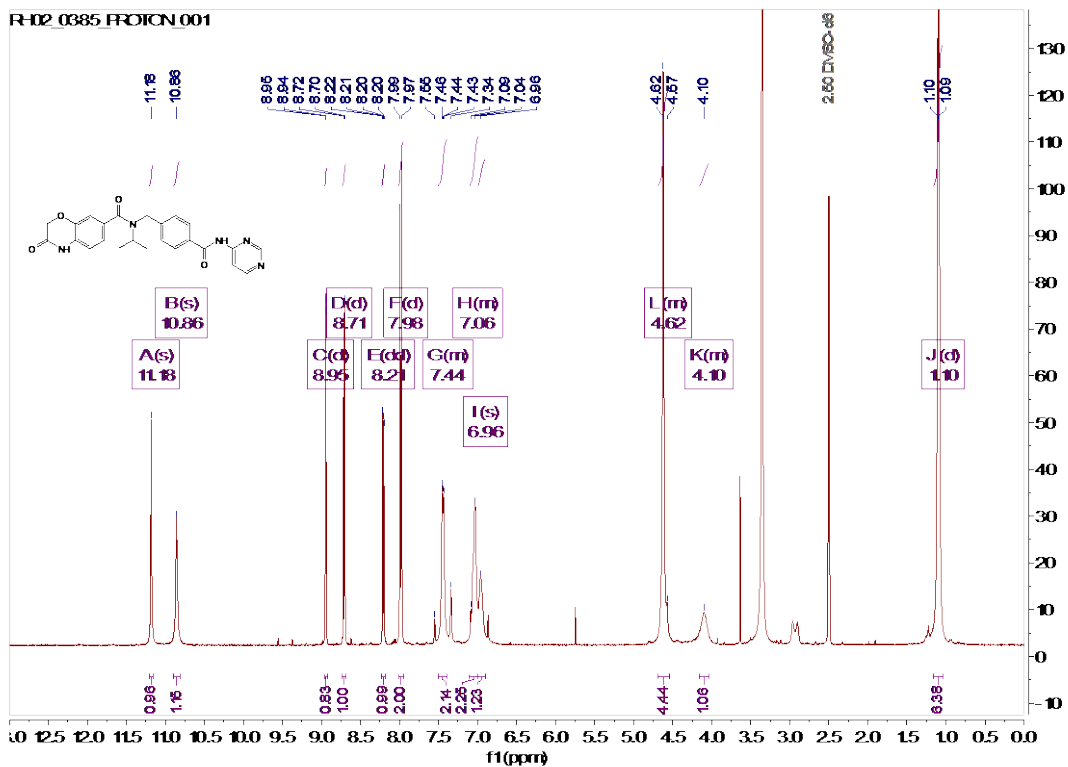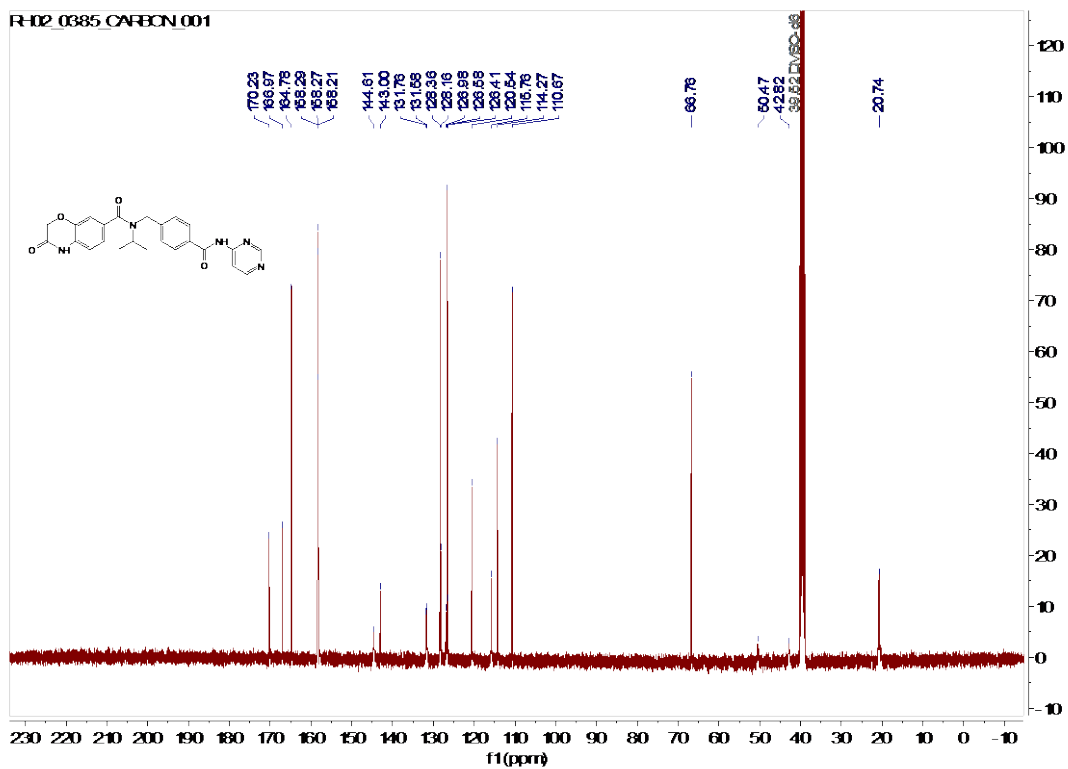

### UNC7145 (4): LCMS trace

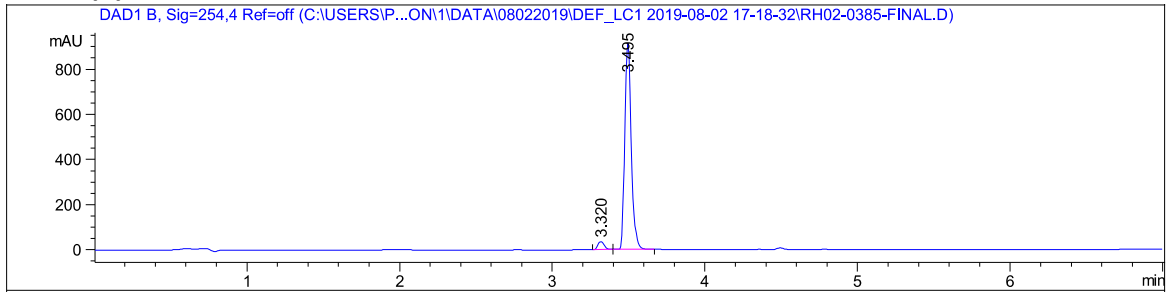

### UNC7145 (4): HRMS spectrum

RH-385 #362-424 RT: 3.43-4.02 AV: 32 NL: 5.64E7  
T: FTMS + c ESI Full ms [130.0000-600.0000]

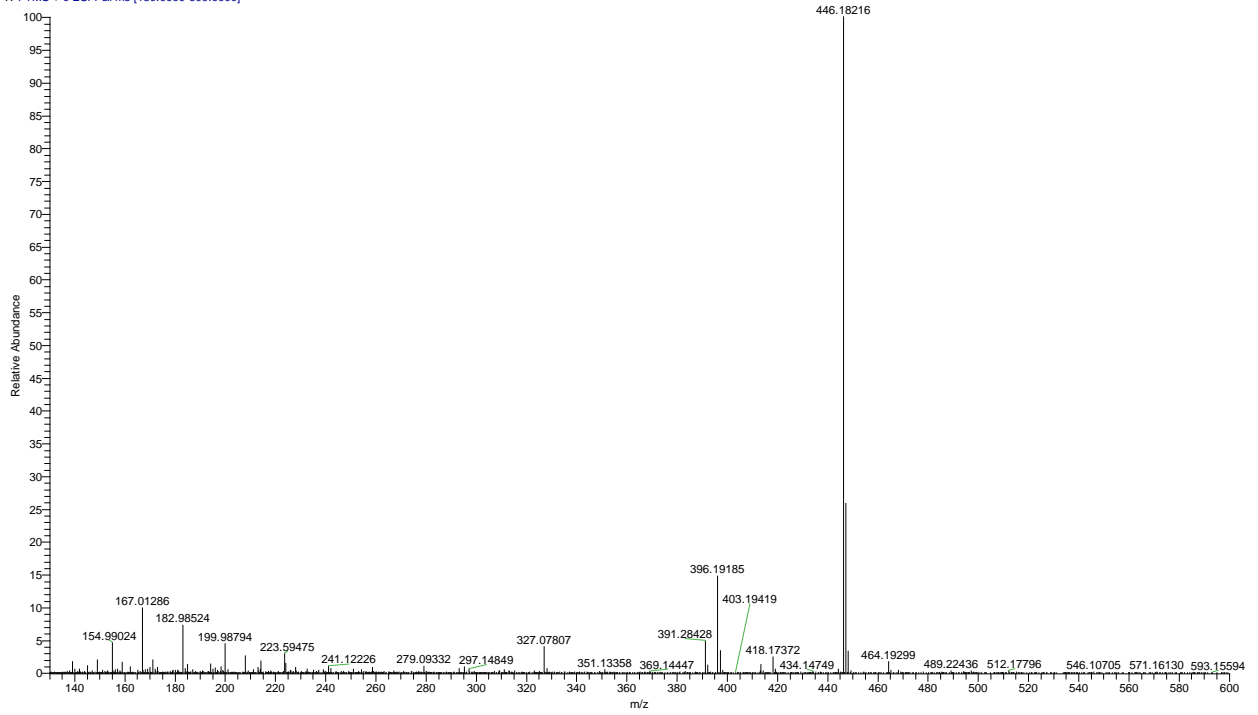

(12): <sup>1</sup>H-NMR and <sup>13</sup>C-NMR in CDCl<sub>3</sub>

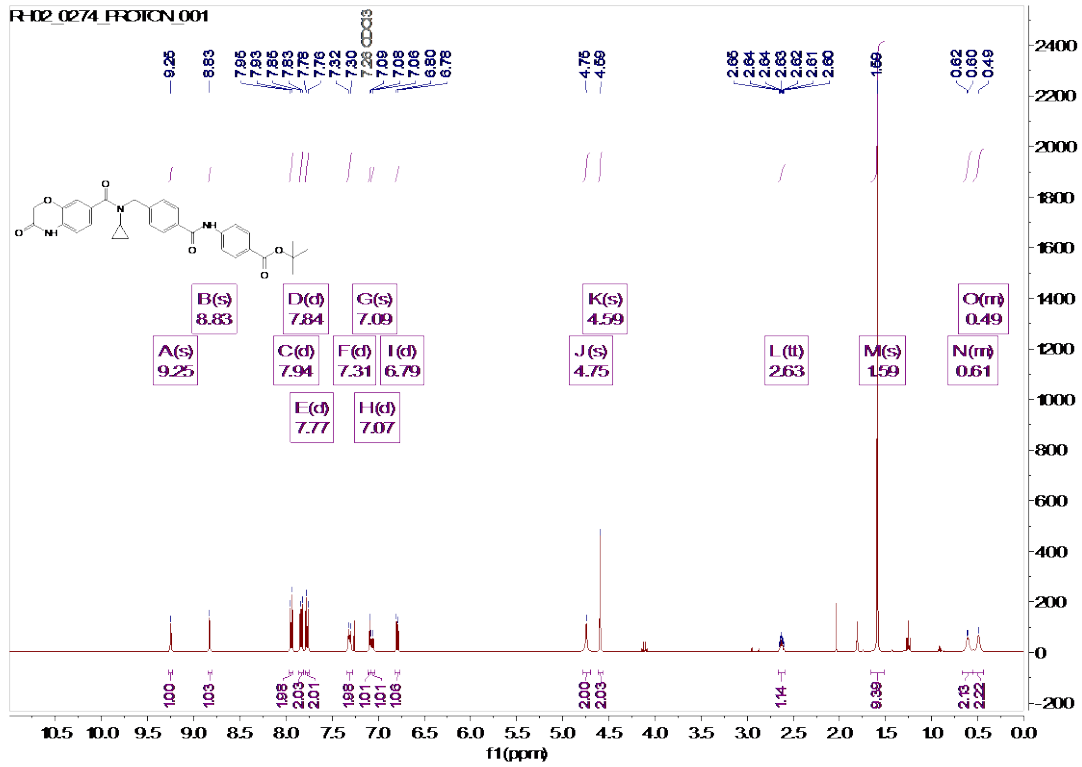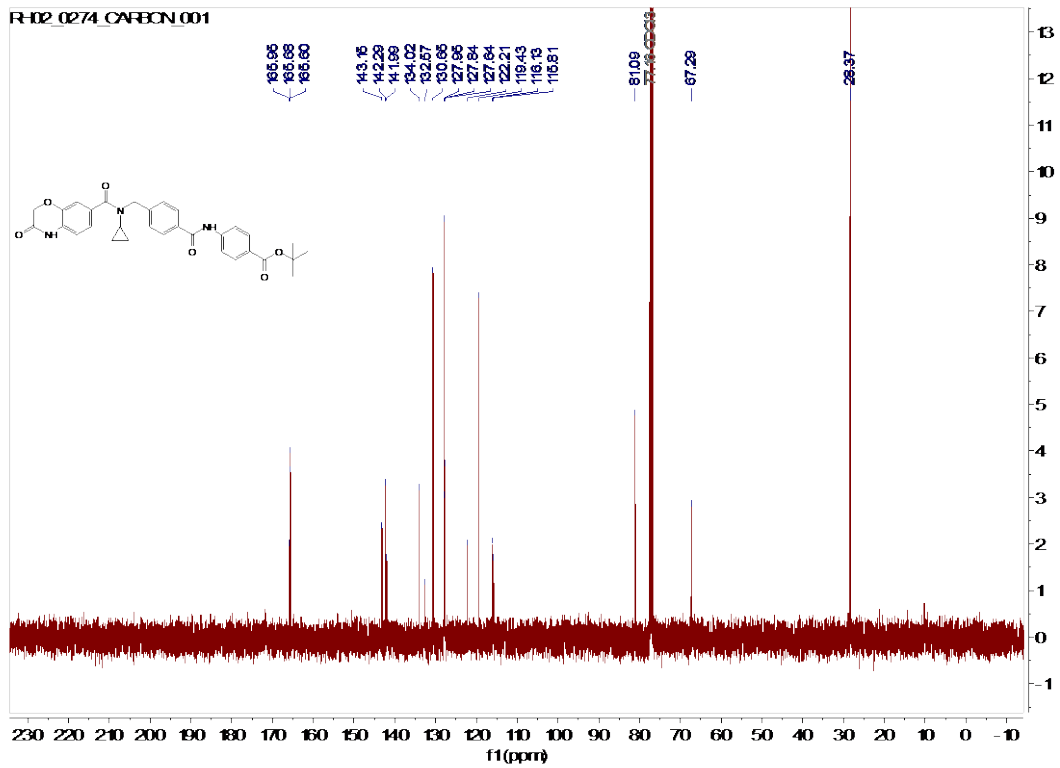

(13): <sup>1</sup>H-NMR in DMSO-d<sub>6</sub>

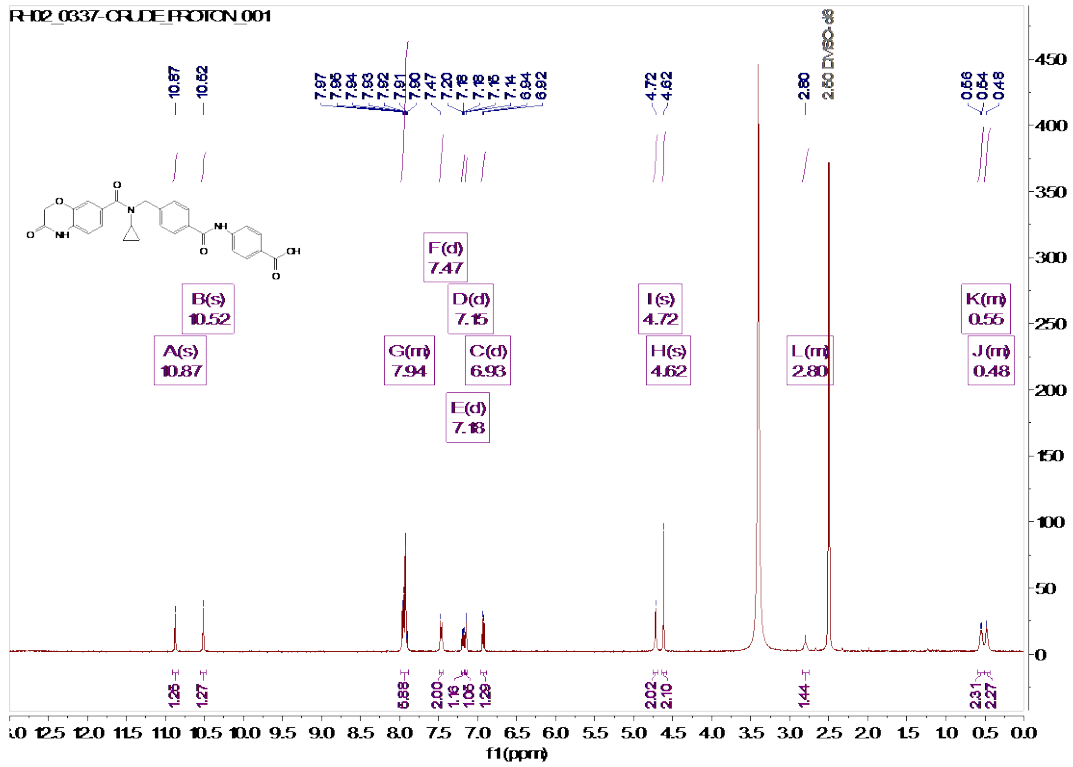

UNC7096 (5): <sup>1</sup>H-NMR in CD<sub>3</sub>OD

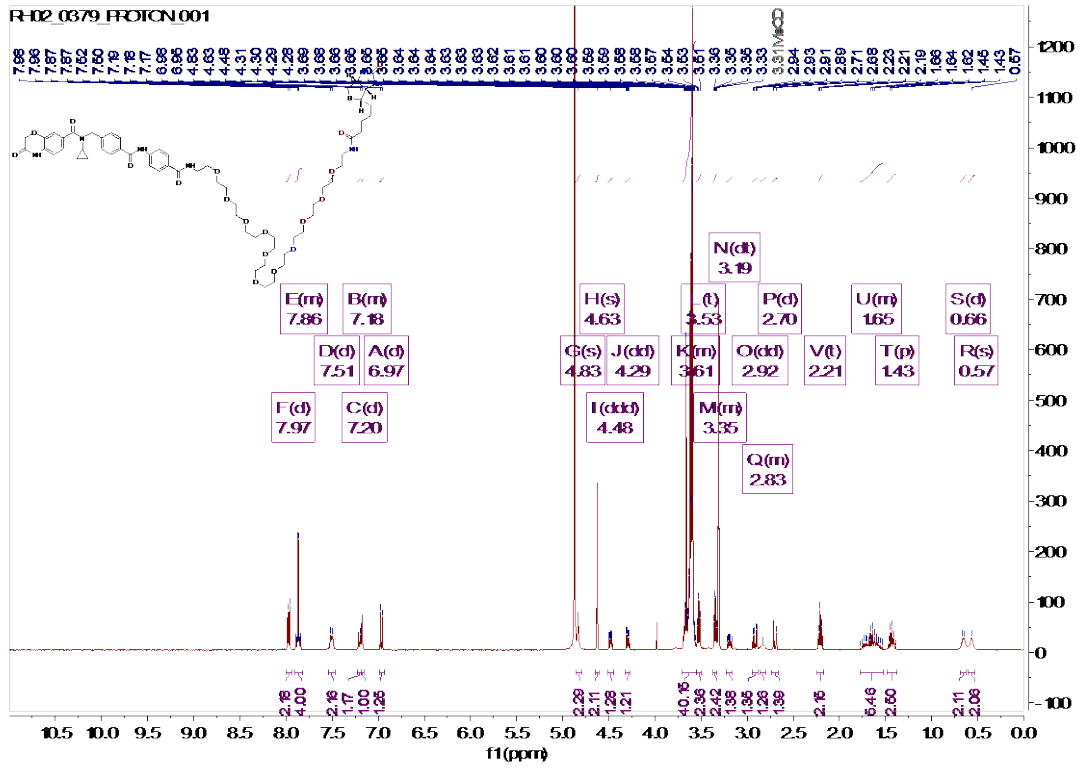

UNC7096 (5): LCMS trace

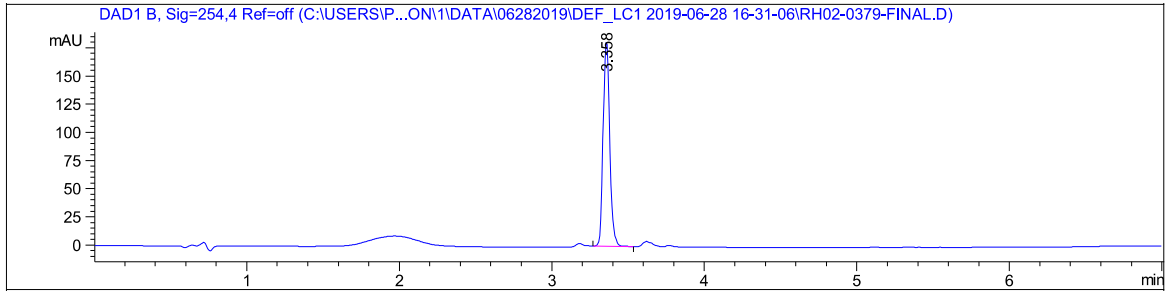

UNC7096 (5): HRMS

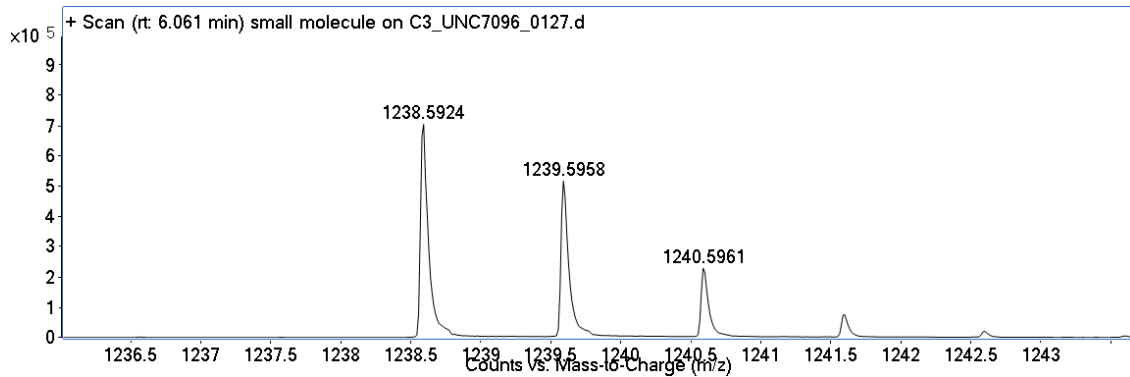

Supplement: NIHMS1811467-supplement-SI.pdf [file NIHMS1811467-supplement-SI.pdf]
